# Supplementary material
Source: publisher figshare collection journal article supplement (https://acs.figshare.com/ndownloader/files/35104727)
Supplement: Supplementary file 1 [file 35104727]

## Supplementary information

### **Continuous filtration of multi-metal contaminated river and groundwater using antioxidant preserved redox-sensitive nanocomposites: ultrahigh reactivity and self-sedimentation possibility**

Nitin Khandelwal<sup>a</sup>, Jai Kishan Rajak<sup>a</sup>, Nisha Singh<sup>a</sup>, Ekta Tiwari<sup>a</sup>, Zahid Ahmad Ganie<sup>a</sup>, Aniket Choudhary<sup>a</sup>, Gopala Krishna Darbha<sup>a,b,\*</sup>

<sup>a</sup> Environmental Nanoscience Laboratory, Department of Earth Sciences, Indian Institute of Science Education and Research Kolkata, Mohanpur, West Bengal, India- 741246

<sup>b</sup> Centre for Climate and Environmental Studies, Indian Institute of Science Education and Research Kolkata, Mohanpur, West Bengal, India, 741246

\*Corresponding author: Gopala Krishna Darbha, Email- [gkdarbha@gmail.com](mailto:gkdarbha@gmail.com), [gkdarbha80@yahoo.com](mailto:gkdarbha80@yahoo.com) Tel: (+91)- 9849626082

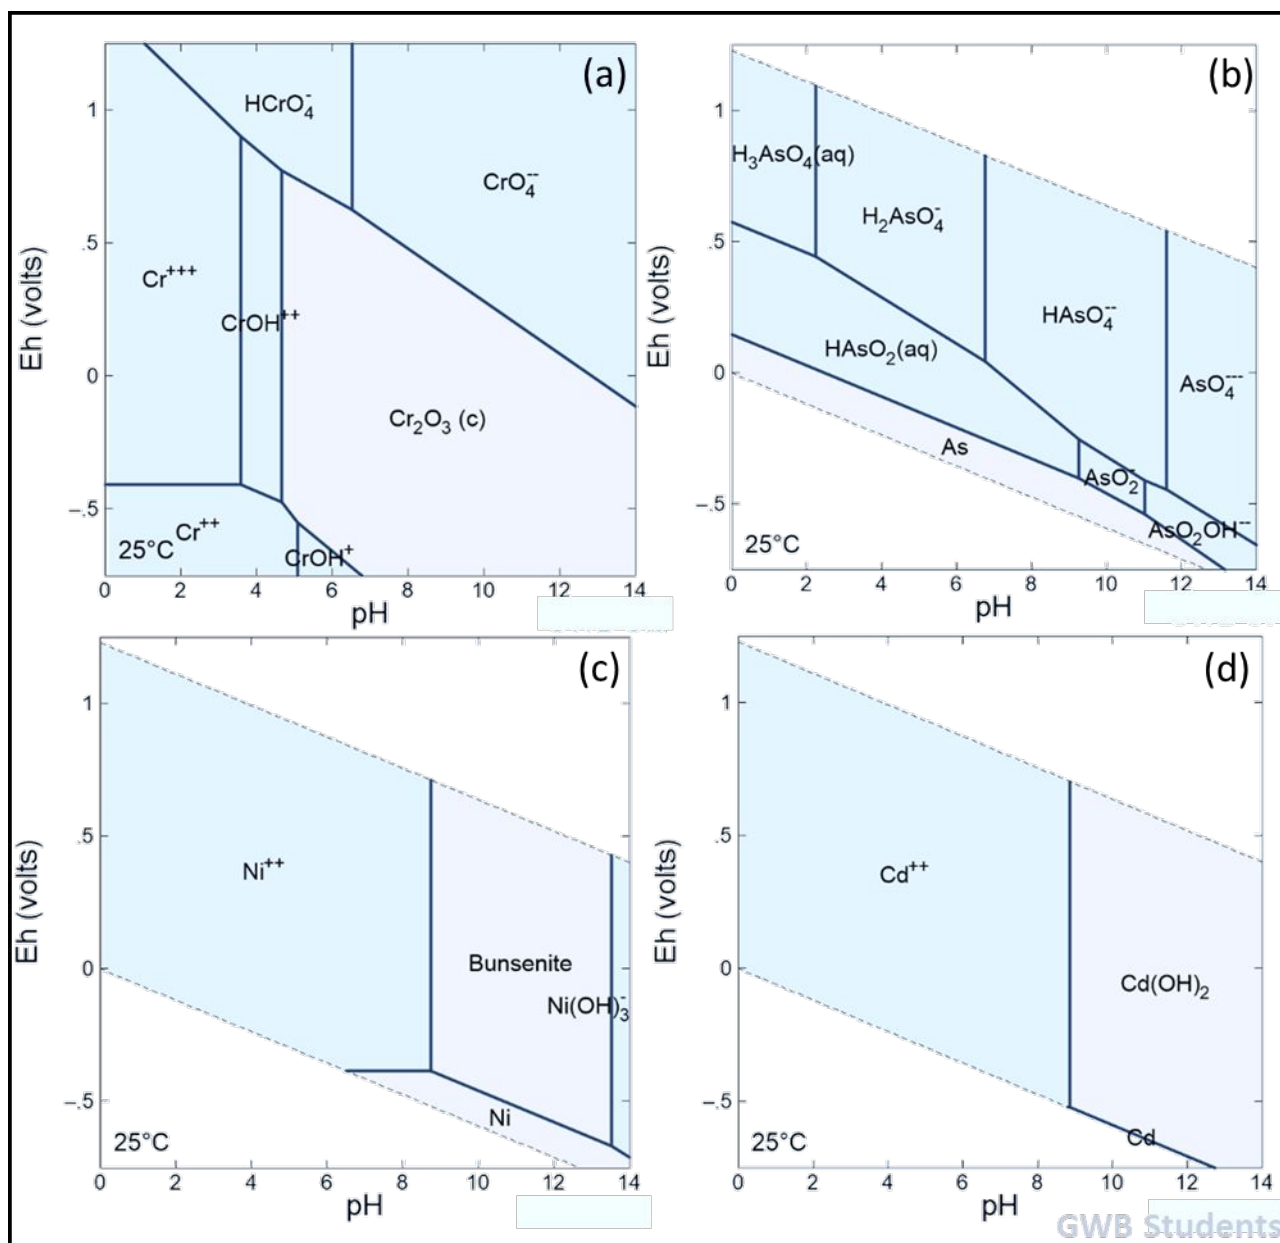

**Fig. S1** Eh-pH speciation diagrams for (a)  $\text{CrO}_4^{2-}$ , (b)  $\text{AsO}_2^-$ , (c)  $\text{Ni}^{2+}$  and (d)  $\text{Cd}^{2+}$

## **Section-1**

### **1.1 Materials and methods: characterization**

Synthesized composites and raw materials were characterized for morphology and composition using scanning and transmission electron microscopy (Carl Zeiss SUPRA 55VP FESEM and UHR-FEG-TEM, JEOL, JEM 2100 F model using a 200 kV electron source, respectively) both associated with EDAX (Oxford INCA).

For obtaining crystallinity, powder x-ray diffraction data was obtained using Rigaku (mini flex, Japan) benchtop powder X-ray diffractometer having  $\text{Cu K}\alpha = 1.54059 \text{ \AA}$  radiation at 40 kV/15 mA. Scanning range and scanning rates were  $5^\circ$  to  $65^\circ 2\theta$  and  $5^\circ 2\theta$  per minute respectively.

Point of zero charge ( $\text{pH}_{\text{PZC}}$ ) and zeta potential of suspension was measured through a dynamic light scattering (DLS) instrument using Zetasizer, Malvern, UK. Surface functionality of the materials was analyzed using Fourier transformation infrared spectroscopy (FTIR, Nicolet I5, Thermoscientific) using KBr pallet method. Almond skin extracts (Antioxidants) concentrations were qualitatively observed using UV-Vis spectrophotometer (Evolution 201, Thermoscientific) before and after the modification of composites. Surface redox state and composition of elements was studied with the help of X-ray Photoelectron Spectroscopy (XPS, Nexsa, Thermofisher-Scientific) incorporating  $\text{Al K}\alpha$  as the source of X-ray.

### **1.2 Synthesis of antioxidant capped biochar-iron (ASBC-I) nanocomposites**

As shown in fig. 1, for stage-1 modification, biochar powders were dispersed in antioxidants solution and sonicated. Then, antioxidant modified biochar was dispersed in 4:1 ethanol: water interfacial iron solution ( $\text{Fe/BC}$  mass ratio= 1). The suspension was sonicated (30 min) and shaken (30 min) sequentially to allow iron to homogeneously interact with the biochar surface. Later,  $\text{NaBH}_4$  solution (0.94 M) was added dropwise under continuous stirring for the reduction

and formation of elemental iron nanoparticles on biochar surface <sup>1, 2</sup>. After complete addition, the reaction mixture was vigorously stirred for another 20 minutes to assure complete reduction. Then the precipitate was filtered and washed with ethanol. In the stage-2 modification, washed precipitates were added to the antioxidant solution and sonicated to assure proper antioxidant capping of the composite. The obtained composites after stage-2 modification are denoted as ASBC-I nanocomposites i.e., ASBC-I-550 and ASBC-I-750, respectively denoting the pyrolysis temperature of biochar surface used. In the end, composites were separated from the antioxidant solution, washed with ethanol, vacuum dried, and stored for further use. Schematic representation of the synthesis scheme is provided in fig. 1.

**Table-S1** Physiochemical parameters of utilized water samples

| S. No. | Component                          | Concentration           |                          |                           |
|--------|------------------------------------|-------------------------|--------------------------|---------------------------|
|        |                                    | Groundwater             | River water              | Synthetic Rain water      |
| 1      | SO <sub>4</sub> <sup>2-</sup> (mM) | 0.14                    | 0.22                     | 0.028                     |
| 2      | Cl <sup>-</sup> (mM)               | 0.93                    | 0.69                     | 0.007                     |
| 3      | HCO <sub>3</sub> <sup>-</sup> (mM) | 4.5                     | 1.22                     | -                         |
| 4      | NO <sub>3</sub> <sup>-</sup> (mM)  | 0.05                    | 0.038                    | 0.008                     |
| 5      | Na <sup>+</sup> (mM)               | 1.3                     | 0.57                     | 0.008                     |
| 6      | Ca <sup>2+</sup> (mM)              | 2.8                     | 0.46                     | 0.0002                    |
| 7      | Mg <sup>2+</sup> (mM)              | 0.95                    | 0.22                     | 0.001                     |
| 8      | K <sup>+</sup> (mM)                | 0.02                    | 0.063                    | 0.0012                    |
| 9      | Humic Acid (mg/L)                  | 3.5                     | 1.85                     | -                         |
| 10     | pH                                 | 7.4                     | 7.6                      | 4.3                       |
| 11     | Ionic strength                     | 11 X 10 <sup>-3</sup> M | 2.3 × 10 <sup>-3</sup> M | 0.31 X 10 <sup>-3</sup> M |

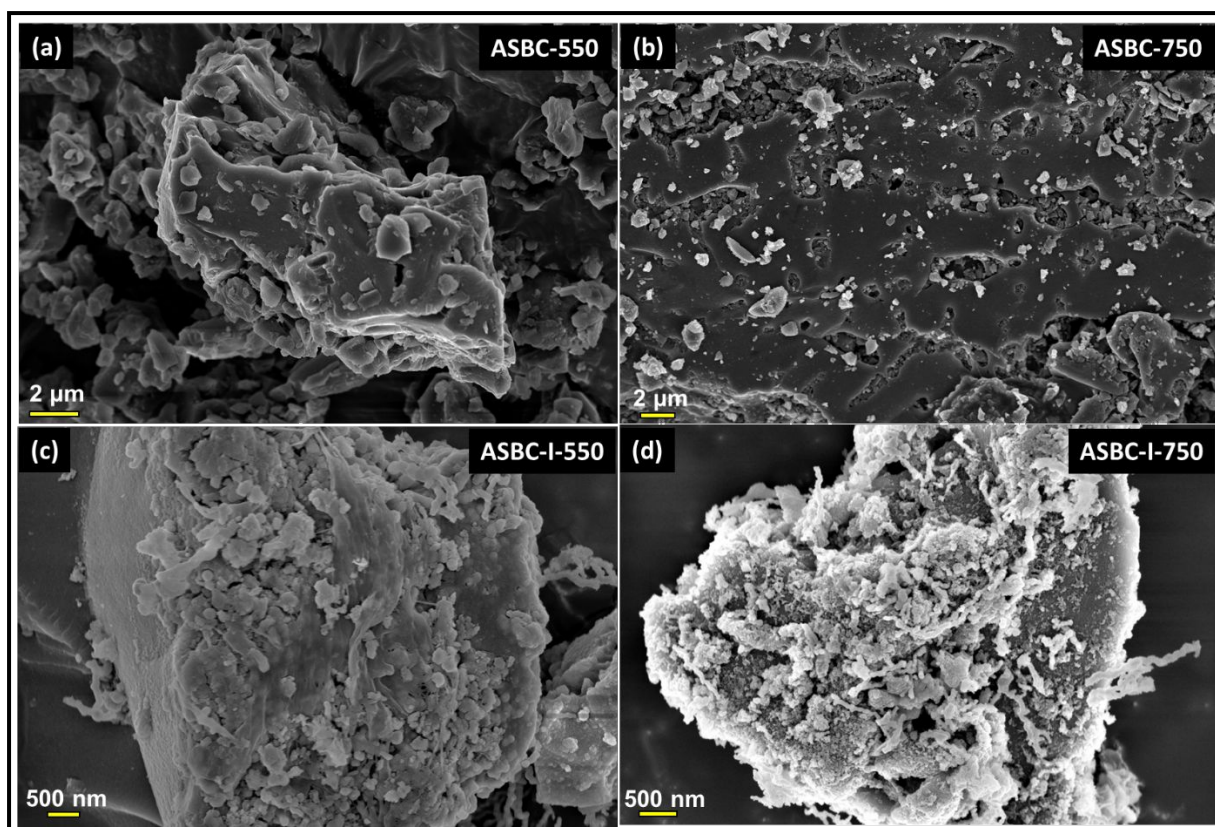

**Fig. S2** FESEM images of (a) ASBC-550, (b) ASBC-750, (c) ASBC-I-550 and (d) ASBC-I-750 composites.

**Table-S2** Elemental composition of raw biochar and synthesized composite (in atomic%)

|                   | <b>C</b> | <b>N</b> | <b>O</b> | <b>Fe</b> |
|-------------------|----------|----------|----------|-----------|
| <b>ASBC-550</b>   | 42.7     | 46.8     | 10.5     | -         |
| <b>ASBC-750</b>   | 44.6     | 49.2     | 6.2      | -         |
| <b>ASBC-I-550</b> | 20.1     | 17.9     | 33.1     | 28.7      |
| <b>ASBC-I-750</b> | 23.7     | 23.1     | 25.2     | 27.9      |

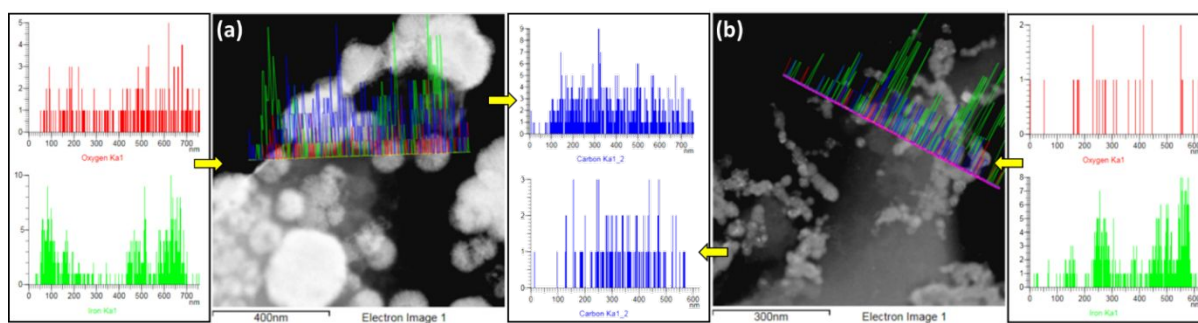

**Fig. S3** TEM elemental line scans along nZVI particles in (a) ASBC-I-550 and (b) ASBC-I-750 composites

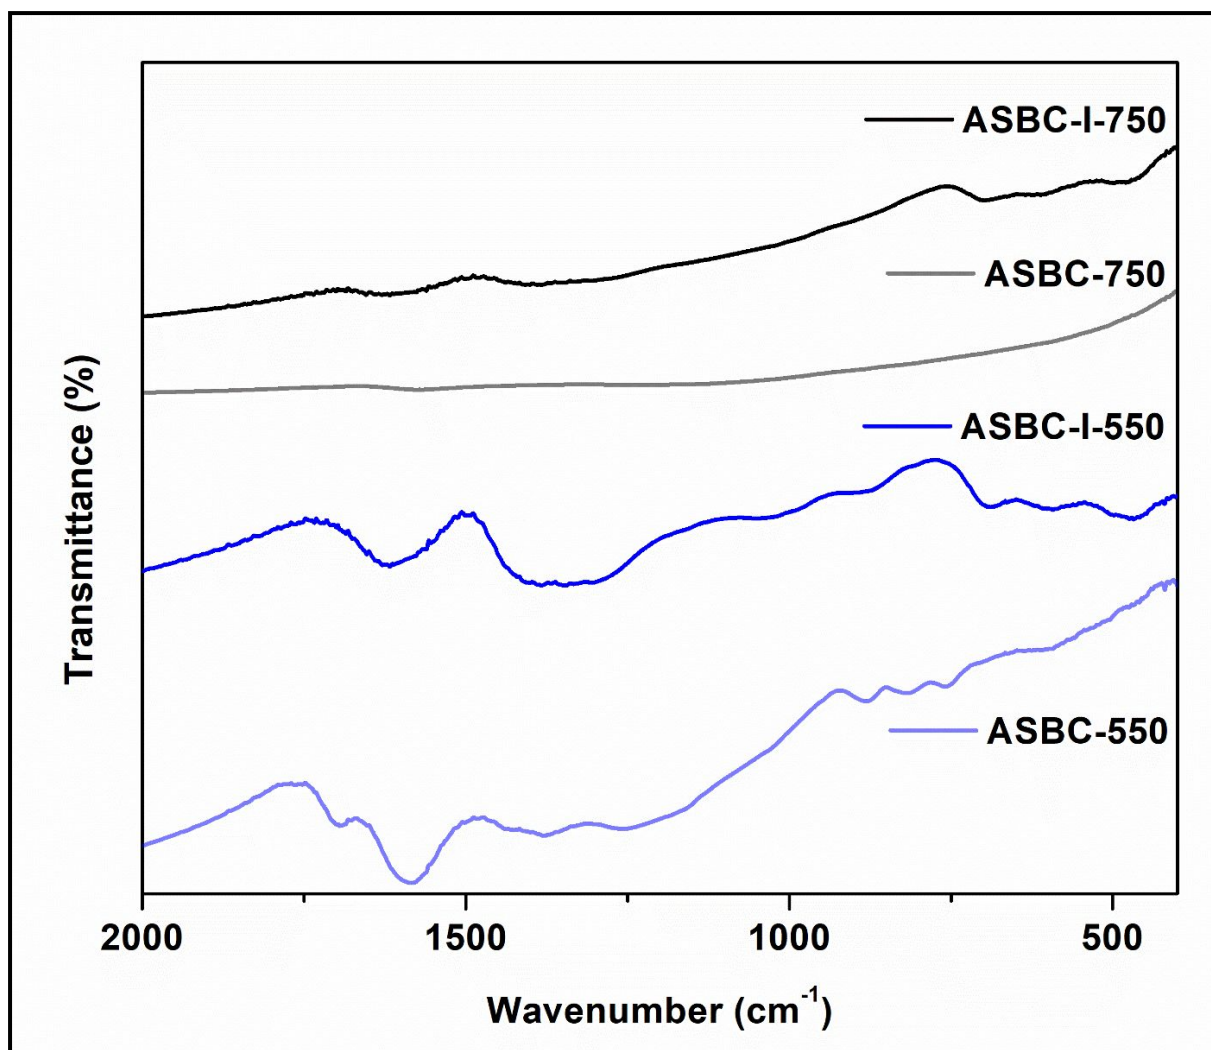

**Fig. S4** FTIR spectra of biochar and nanocomposites

#### 1.4 FTIR Analysis: surface functionality of the composites

FTIR spectra in fig. S4 shows that peaks associated with ASBC-550 such as-  $1694\text{ cm}^{-1}$  (C=O/N-H stretching),  $1585\text{ cm}^{-1}$  (C=C cyclic alkene stretching),  $1437\text{ cm}^{-1}$  (C-H<sub>2</sub> stretching and O-H bending due to alcohol),  $1378\text{ cm}^{-1}$  (O=C-O stretching), and  $873\text{ cm}^{-1}$  (aromatic C-H out-of-plane deformation) were decreased and disappeared at higher pyrolysis temperature biochar i.e. ASBC-750<sup>3</sup>. After the growth of iron nanoparticles on the surface, these peaks of ASBC-550 in the region  $1400\text{-}1700\text{ cm}^{-1}$  disappeared whereas a sharp decrease was observed in the intensity of peaks in the region  $700\text{-}900\text{ cm}^{-1}$  with a slight shift. Simultaneously, various new peaks corresponding to iron nanoparticles appeared, suggesting that ASBC-I composites are



not just a physical mixture of particles and surface and include various chemical interactions.

Major FTIR peaks in ASBC-I-550 and ASBC-I-750 were  $1630\text{ cm}^{-1}$  (O-H stretching of  $\text{H}_2\text{O}$  and  $\text{FeOOH}$ ),  $690\text{ cm}^{-1}$  (symmetric Fe-O stretching),  $590\text{ cm}^{-1}$  (Fe-O stretching modes of tetrahedral and octahedral sites), and  $470\text{ cm}^{-1}$  (Fe-O stretching due to Hematite)<sup>4</sup>.

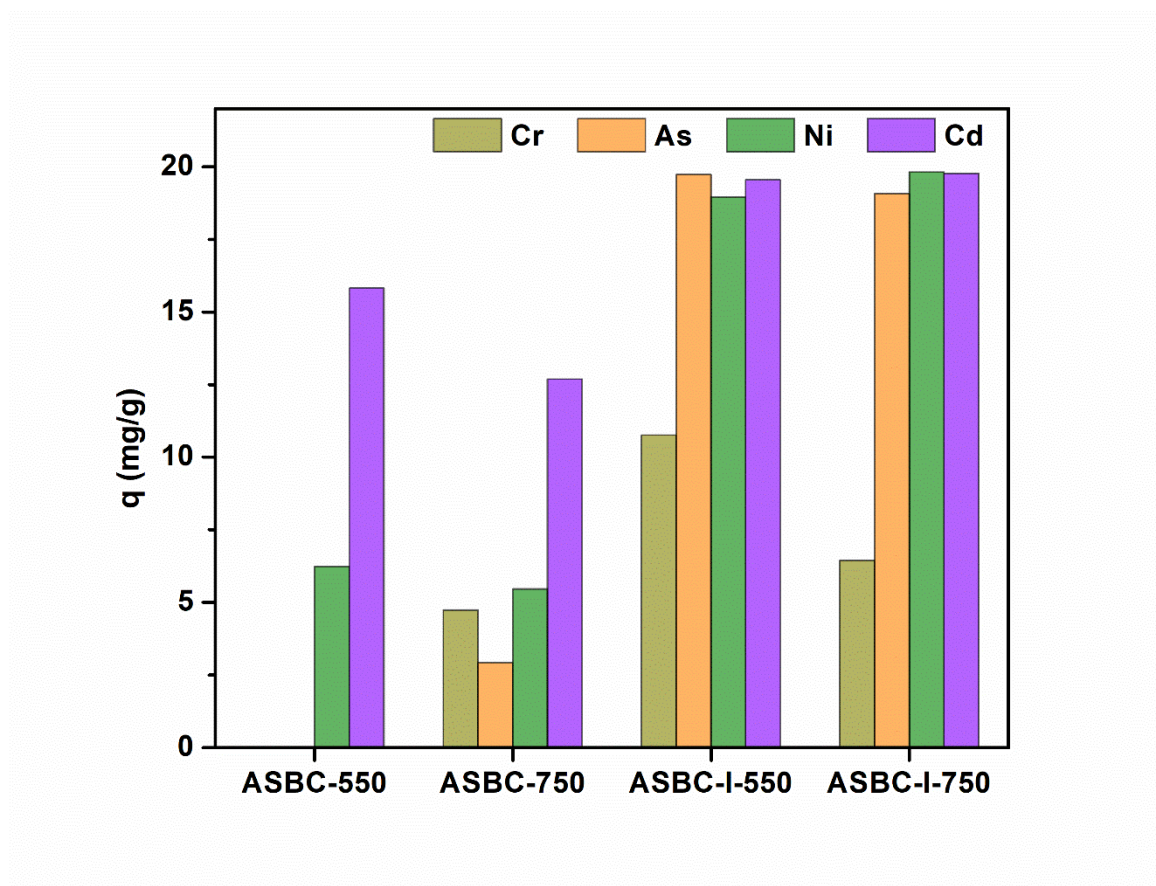

**Fig. S5** Sorption capacities of biochar and respective nanocomposites for different metallic species

## Section-2

### Non-linear kinetics modelling

| Kinetic models                 | Non-linear equations                                                                |
|--------------------------------|-------------------------------------------------------------------------------------|
| pseudo-first-order             | $q_t = q_e \cdot [1 - \exp(-k_1 \cdot t)]$                                          |
| pseudo-second-order            | $q_t = q_e - \frac{q_e}{[k_2 (q_e) \cdot t + 1]}$                                   |
| General order                  | $q_t = q_e - \frac{q_e}{[k_N (q_e)^{n-1} \cdot t \cdot (n-1) + 1]^{\frac{1}{1-n}}}$ |
| Intra-particle diffusion (IPD) | $q_t = k_i \sqrt{t} + C$                                                            |

Where:

$q_e$  = Equilibrium sorption capacity (mg/g) ,  $q_t$  = Sorption capacity at time= t (mg/g)

$k_1$  = pseudo-first-order reaction rate constant ( $\text{min}^{-1}$ ) ,  $k_2$  = second order reaction rate constant ( $\text{g mg}^{-1} \text{min}^{-1}$ ),  $k_N$  = General order reaction rate constant [ $\text{min}^{-1} (\text{g mg}^{-1})^{n-1}$ ] and  $k_i$  = intra particle diffusion rate constant ( $\text{mg/g hr}^{0.5}$ )

n= order of the reaction and intercept C gives resistance in mass transfer due to boundary layer

Both the kinetic models i.e. pseudo 1<sup>st</sup> and 2<sup>nd</sup> order are with presumed orders for the uptake of the contaminants. For example- pseudo 2<sup>nd</sup> order assumes that the rate of uptake of adsorbate is of 2<sup>nd</sup> order with respect to all the available sorption sites<sup>5</sup>. Logically, it would be better to obtain the order of a reaction kinetics from the experimental data itself rather than assuming any order. As the process of adsorption is considered to be the rate determining step, it helped in establishing the general order kinetic model. Which states that “the order of sorption process should follow the same trend as that of a chemical reaction, where the order of the reaction is

not being restrained by a given model but experimentally”<sup>6, 7</sup>. Whereas, intra particle diffusion (IPD) is based on Fick’s second law of diffusion<sup>8</sup>.

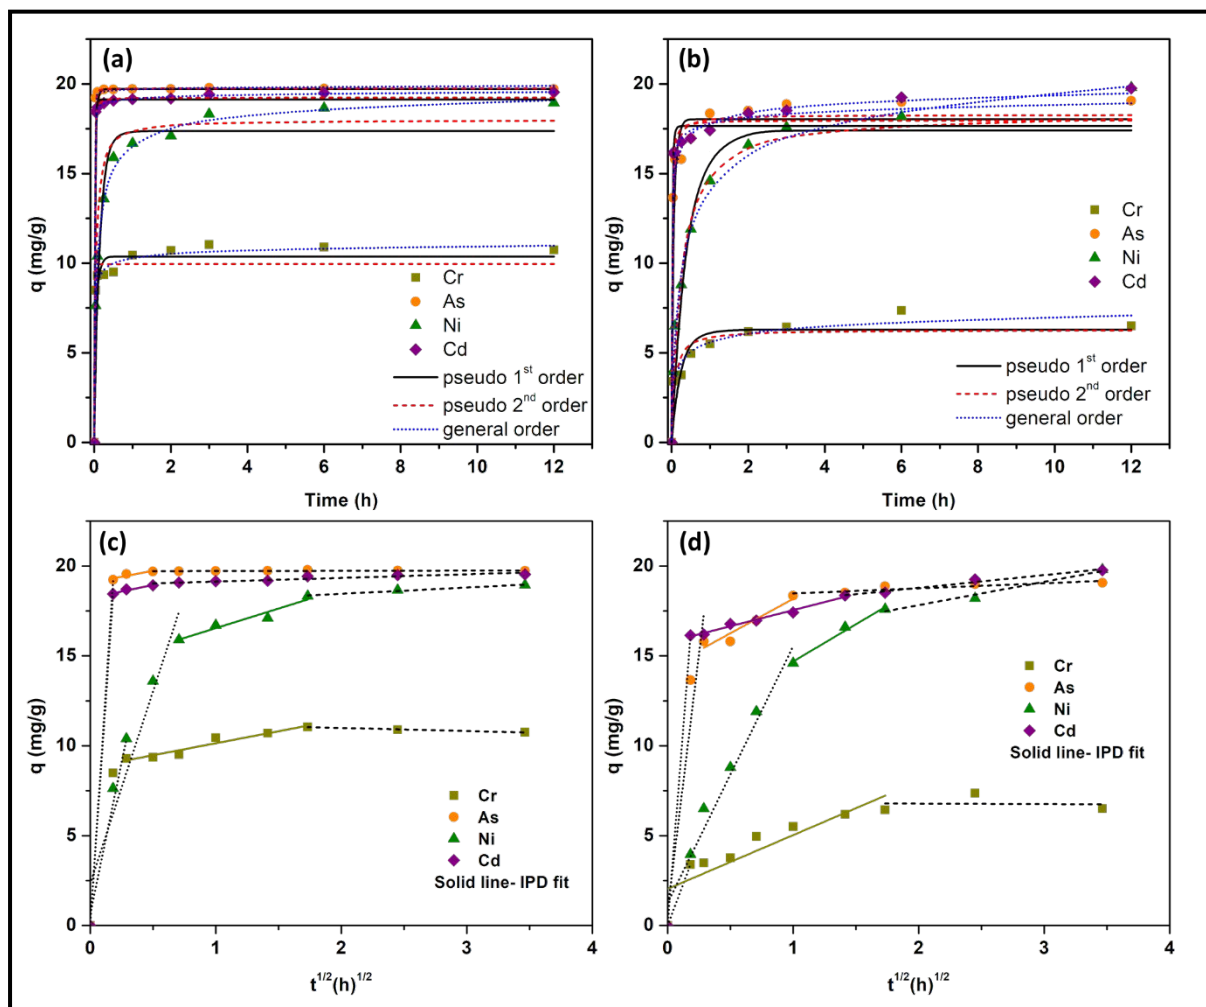

**Fig. S6** experimental kinetic data and various fitted kinetic models i.e. pseudo first order, pseudo second order and general order for (a) ASBC-I-550 and (b) ASBC-I-750, and (c, d) IPD modelling for ASBC-I-550 and ASBC-I-750 respectively

**Table S3** parameters obtained for fitted kinetic models and calculated errors

| Kinetic models                 |            | Pseudo first order          |             |                | Pseudo second order                            |             |                | General order               |             |       |                | Intraparticle diffusion (IPD) |           |                |
|--------------------------------|------------|-----------------------------|-------------|----------------|------------------------------------------------|-------------|----------------|-----------------------------|-------------|-------|----------------|-------------------------------|-----------|----------------|
| Adsorbate                      |            | $K_1$<br>(h <sup>-1</sup> ) | q<br>(mg/g) | R <sup>2</sup> | $K_2$<br>(g mg <sup>-1</sup> h <sup>-1</sup> ) | q<br>(mg/g) | R <sup>2</sup> | $K_n$<br>(h <sup>-1</sup> ) | q<br>(mg/g) | n     | R <sup>2</sup> | K<br>(mg/g h <sup>1/2</sup> ) | Intercept | R <sup>2</sup> |
| CrO <sub>4</sub> <sup>2-</sup> | ASBC-I-550 | 26.94                       | 10.37       | 0.93           | 2859.29                                        | 9.95        | 0.93           | 5.38E-02                    | 11.77       | 5.03  | 0.99           | 1.33                          | 8.80      | 0.92           |
|                                | ASBC-I-750 | 4.60                        | 6.29        | 0.83           | 2.49                                           | 6.28        | 0.88           | 9.40E-06                    | 10.16       | 7.44  | 0.95           | 2.99                          | 2.04      | 0.74           |
| AsO <sub>2</sub> <sup>-</sup>  | ASBC-I-550 | 56.96                       | 19.73       | 0.98           | 113.40                                         | 19.75       | 1.00           | 6.44E-02                    | 20.72       | 13.39 | 1.00           | 1.34                          | 19.07     | 0.68           |
|                                | ASBC-I-750 | 24.53                       | 18.03       | 0.94           | 4.27                                           | 18.28       | 0.98           | 3.82E-04                    | 21.75       | 5.68  | 1.00           | 3.83                          | 14.34     | 0.87           |
| Ni <sup>2+</sup>               | ASBC-I-550 | 8.65                        | 17.38       | 0.90           | 1.74                                           | 18.00       | 0.93           | 1.55E-02                    | 20.48       | 3.44  | 0.99           | 2.18                          | 14.37     | 0.91           |
|                                | ASBC-I-750 | 2.67                        | 17.42       | 0.94           | 0.25                                           | 18.36       | 0.97           | 5.42E-06                    | 26.94       | 5.20  | 0.99           | 4.13                          | 10.55     | 0.97           |
| Cd <sup>2+</sup>               | ASBC-I-550 | 99.10                       | 19.14       | 1.00           | 31.54                                          | 19.24       | 1.00           | 1.94E-02                    | 20.48       | 8.53  | 1.00           | 1.45                          | 18.22     | 0.91           |
|                                | ASBC-I-750 | 71.75                       | 17.66       | 0.96           | 10.90                                          | 17.97       | 0.97           | 8.03E-07                    | 22.06       | 9.25  | 0.99           | 1.79                          | 15.76     | 0.98           |

| Kinetic models                 |            | Pseudo first order |       |        |            |        | Pseudo second order |       |        |            |        | General order |       |        |            |        |
|--------------------------------|------------|--------------------|-------|--------|------------|--------|---------------------|-------|--------|------------|--------|---------------|-------|--------|------------|--------|
| Adsorbate                      |            | SSE                | RMSE  | ARE    | Chi-square | HYBRID | SSE                 | RMSE  | ARE    | Chi-square | HYBRID | SSE           | RMSE  | ARE    | Chi-square | HYBRID |
| CrO <sub>4</sub> <sup>2-</sup> | ASBC-I-550 | 6.247              | 0.901 | 2.334  | 1.149      | 11.405 | 7.208               | 0.772 | -0.485 | 0.599      | 7.709  | 2.212         | 0.258 | 0.163  | 0.067      | 0.969  |
|                                | ASBC-I-750 | 7.477              | 1.046 | 9.039  | 8.557      | 36.331 | 5.345               | 0.709 | 0.394  | 1.351      | 14.528 | 3.321         | 0.406 | 0.222  | 0.412      | 5.658  |
| AsO <sub>2</sub> <sup>-</sup>  | ASBC-I-550 | 2.611              | 0.779 | 1.281  | 0.362      | 3.946  | 0.513               | 0.088 | -0.218 | 0.004      | 0.050  | 0.708         | 0.073 | -0.001 | 0.003      | 0.039  |
|                                | ASBC-I-750 | 10.603             | 1.440 | 2.086  | 1.715      | 17.698 | 5.811               | 0.684 | -0.108 | 0.269      | 3.533  | 3.089         | 0.365 | -0.042 | 0.081      | 1.166  |
| Ni <sup>2+</sup>               | ASBC-I-550 | 12.531             | 1.439 | 4.247  | 3.183      | 26.452 | 11.188              | 1.329 | -7.055 | 1.302      | 19.427 | 2.186         | 0.270 | 0.009  | 0.050      | 0.717  |
|                                | ASBC-I-750 | 12.457             | 1.415 | 9.455  | 7.052      | 41.020 | 8.102               | 0.827 | 4.366  | 1.551      | 13.969 | 3.987         | 0.481 | 1.179  | 0.276      | 3.913  |
| Cd <sup>2+</sup>               | ASBC-I-550 | 1.825              | 0.213 | -0.012 | 0.024      | 0.298  | 1.416               | 0.141 | -0.005 | 0.010      | 0.130  | 0.296         | 0.044 | -0.001 | 0.001      | 0.014  |
|                                | ASBC-I-750 | 8.608              | 0.845 | -0.222 | 0.405      | 5.045  | 7.543               | 0.683 | -0.138 | 0.266      | 3.294  | 3.605         | 0.340 | 0.058  | 0.066      | 0.941  |

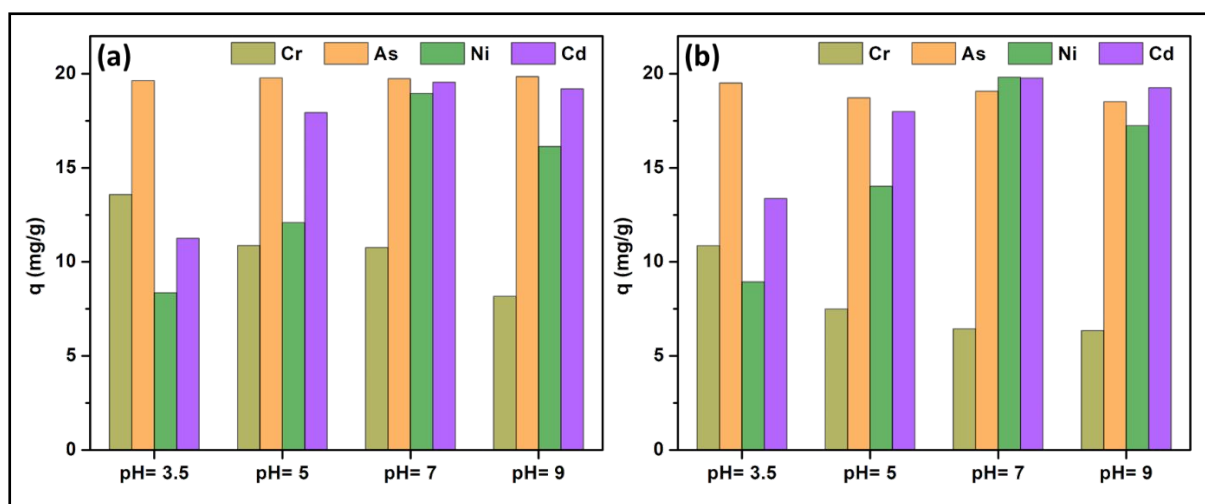

**Fig. S7** Effect of solution pH on the sorption capacities of (a) ASBC-I-550 and (b) ASBC-I-750 nanocomposites for various metals

### Section-3: Adsorption Isotherm models

| Isotherm models | Non-linear equations                          |
|-----------------|-----------------------------------------------|
| Langmuir        | $q_e = \frac{q_m K_L C_e}{1 + K_L C_e}$       |
| Freundlich      | $q_e = K_F C_e^n$                             |
| Sip             | $q = q_{max} \frac{K [C_e]^n}{1 + K [C_e]^n}$ |

**Where:**

$C_e$  (mg/L) = equilibrium concentration,

$q_e$  = sorption capacity at equilibrium (mg/g),

$q_m$  = obtained maximum sorption capacity (mg/g) and

$K_L$  = Langmuir constants (L/mg) related to energy of adsorption

$K_F$  = Freundlich adsorption constant (mg/g)(L/mg)<sup>1/n</sup> and

$n$  = a measure of the adsorption intensity (Freundlich)

$K$  = Sips isotherm constant

$n$  = Sips isotherm exponent

Isotherm is generally utilized to evaluate interactions between adsorbate and adsorbent. Commonly used isotherms include Langmuir model which assumes monolayer sorption of the adsorbate on adsorbent surface. It suggests that all the sorption sites are identical and energetically equivalent<sup>9, 10</sup>. Freundlich model assumes heterogeneous nature of the surface and represents initial sorption on surface followed by condensation effect causing strong adsorbate-adsorbent interaction. To depict isotherm data better, Sip's isotherm model can be used. This model is a combination of both Langmuir and Freundlich model. At low adsorbate concentration this model predicts Freundlich like behavior which converts to plateau or monolayer sorption at higher concentrations<sup>11</sup>.

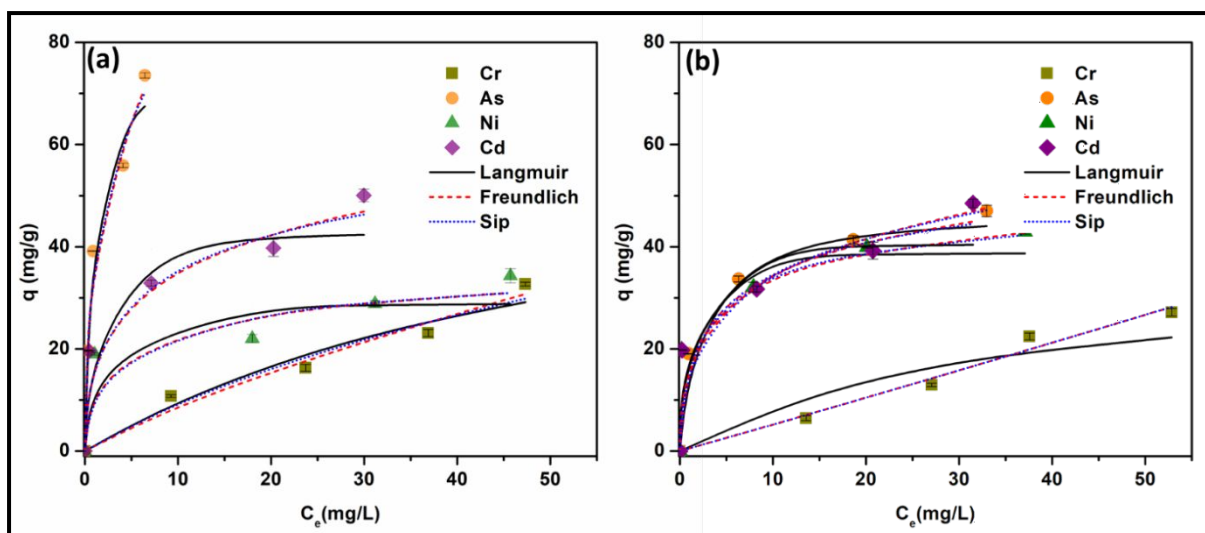

**Fig. S8** Effect of contaminant concentration and various fitted sorption isotherm models for (a) ASBC-I-550 and (b) ASBC-I-750 nanocomposites in monometallic system



**Table S4** parameters obtained for fitted isotherm models in monometallic system and calculated errors

| Sorption isotherm models | Mono-metallic system | Langmuir             |       |       | Freundlich |      |       | Sips                 |      |      |       |
|--------------------------|----------------------|----------------------|-------|-------|------------|------|-------|----------------------|------|------|-------|
| Adsorbate                |                      | $q_{\max}$<br>(mg/g) | $K_L$ | $R^2$ | $K_f$      | $n$  | $R^2$ | $q_{\max}$<br>(mg/g) | $K$  | $n$  | $R^2$ |
| $\text{CrO}_4^{2-}$      | ASBC-I-550           | 59.94                | 0.02  | 0.95  | 1.45       | 0.79 | 0.97  | 118.72               | 0.01 | 0.85 | 0.97  |
|                          | ASBC-I-750           | 34.65                | 0.03  | 0.95  | 0.49       | 1.02 | 0.96  | 68.59                | 0.01 | 1.02 | 0.96  |
| $\text{AsO}_2^-$         | ASBC-I-550           | 76.59                | 1.15  | 0.97  | 36.09      | 0.36 | 0.98  | 167.95               | 0.28 | 0.50 | 0.98  |
|                          | ASBC-I-750           | 46.16                | 0.63  | 0.95  | 20.58      | 0.24 | 0.99  | 97.30                | 0.26 | 0.32 | 0.99  |
| $\text{Ni}^{2+}$         | ASBC-I-550           | 29.16                | 1.62  | 0.90  | 16.92      | 0.16 | 0.95  | 100.30               | 0.20 | 0.22 | 0.94  |
|                          | ASBC-I-750           | 38.91                | 5.18  | 0.83  | 24.65      | 0.15 | 0.99  | 130.21               | 0.24 | 0.21 | 0.98  |
| $\text{Cd}^{2+}$         | ASBC-I-550           | 43.28                | 1.50  | 0.93  | 21.65      | 0.23 | 0.98  | 134.06               | 0.19 | 0.29 | 0.98  |
|                          | ASBC-I-750           | 40.73                | 3.72  | 0.71  | 23.27      | 0.19 | 0.93  | 100.96               | 0.29 | 0.29 | 0.91  |

| Isotherm models     | Mono-metallic system | Langmuir |       |         |            |         | Freundlich |       |        |            |        | Sips   |       |        |            |        |
|---------------------|----------------------|----------|-------|---------|------------|---------|------------|-------|--------|------------|--------|--------|-------|--------|------------|--------|
| Adsorbate           |                      | SSE      | RMSE  | ARE     | Chi-square | HYBRID  | SSE        | RMSE  | ARE    | Chi-square | HYBRID | SSE    | RMSE  | ARE    | Chi-square | HYBRID |
| $\text{CrO}_4^{2-}$ | ASBC-I-550           | 10.262   | 2.406 | -0.914  | 1.318      | 45.024  | 7.884      | 1.782 | 1.816  | 1.057      | 31.433 | 9.040  | 2.059 | -0.042 | 1.050      | 52.224 |
|                     | ASBC-I-750           | 16.063   | 3.652 | -13.229 | 4.197      | 181.405 | 5.411      | 1.379 | -2.181 | 0.524      | 16.750 | 5.411  | 1.379 | -2.181 | 0.524      | 25.125 |
| $\text{AsO}_2^-$    | ASBC-I-550           | 15.375   | 4.288 | 0.811   | 1.500      | 51.874  | 14.253     | 3.309 | -1.386 | 1.381      | 45.927 | 14.435 | 3.391 | -1.110 | 1.211      | 61.356 |
|                     | ASBC-I-750           | 9.320    | 2.206 | 0.914   | 0.739      | 24.266  | 3.527      | 0.955 | -0.533 | 0.166      | 5.520  | 2.533  | 0.731 | -0.211 | 0.096      | 4.767  |
| $\text{Ni}^{2+}$    | ASBC-I-550           | 12.444   | 3.714 | -1.705  | 2.430      | 88.068  | 10.232     | 2.715 | -0.575 | 1.397      | 50.642 | 10.891 | 2.828 | -0.276 | 1.559      | 83.744 |
|                     | ASBC-I-750           | 11.863   | 3.298 | -0.607  | 1.427      | 51.558  | 3.440      | 0.911 | 0.161  | 0.128      | 4.386  | 4.683  | 1.190 | 0.318  | 0.226      | 11.665 |
| $\text{Cd}^{2+}$    | ASBC-I-550           | 18.355   | 4.736 | -0.295  | 2.827      | 94.517  | 8.646      | 2.131 | 0.410  | 0.573      | 19.105 | 10.027 | 2.399 | 0.395  | 0.734      | 36.295 |
|                     | ASBC-I-750           | 18.355   | 4.736 | -0.295  | 2.827      | 94.517  | 8.646      | 2.131 | 0.410  | 0.573      | 19.105 | 10.027 | 2.399 | 0.395  | 0.734      | 36.295 |

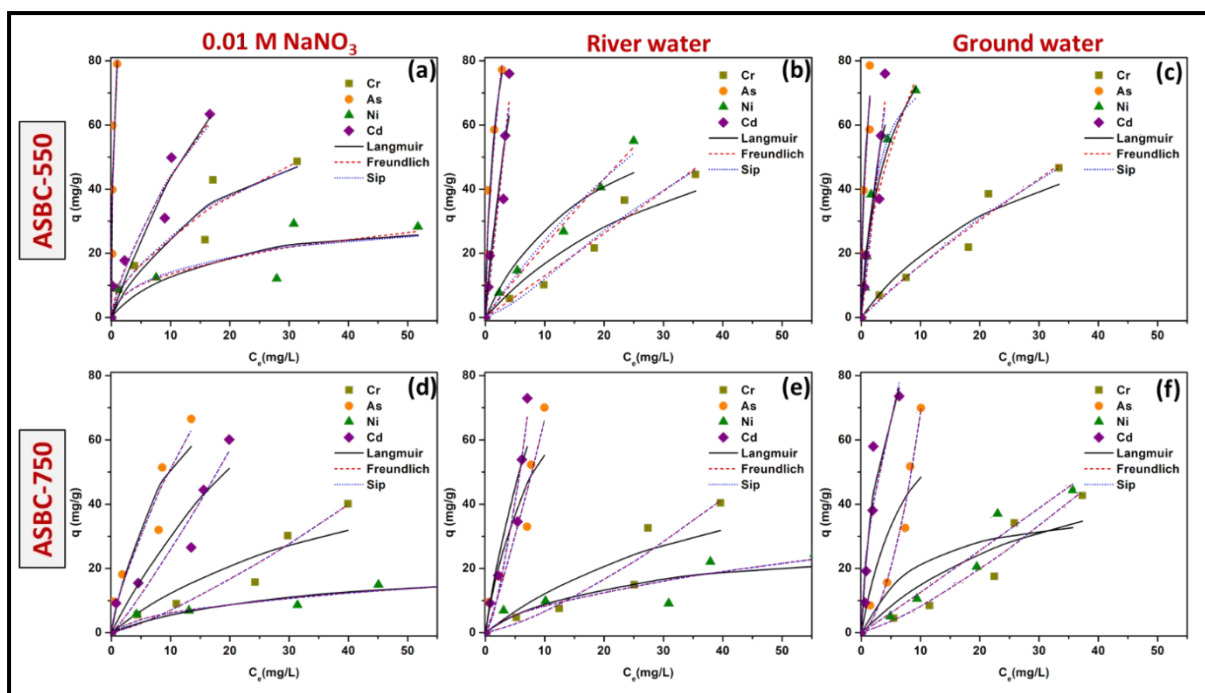

**Fig. S9** Effect of contaminant concentration and various fitted sorption isotherm models for (a-c) ASBC-I-550 and (d-f) ASBC-I-750 nanocomposites in 0.01M  $\text{NaNO}_3$ , river water and groundwater solutions respectively, in multi-metallic system

**Table S5** parameters obtained for fitted isotherm models for  $\text{CrO}_4^{2-}$  removal in multi-metallic system and calculated errors

| Sorption isotherm models | $\text{CrO}_4^{2-}$ | Langmuir                   |       |       | Freundlich |      |       | Sips                       |      |      |       |
|--------------------------|---------------------|----------------------------|-------|-------|------------|------|-------|----------------------------|------|------|-------|
| Waters                   |                     | $q_{\text{max}}$<br>(mg/g) | $K_L$ | $R^2$ | $K_f$      | n    | $R^2$ | $q_{\text{max}}$<br>(mg/g) | K    | n    | $R^2$ |
| 0.01 M $\text{NaNO}_3$   | ASBC-I-550          | 72.81                      | 0.06  | 0.91  | 7.17       | 0.56 | 0.92  | 125.97                     | 0.06 | 0.69 | 0.92  |
|                          | ASBC-I-750          | 64.05                      | 0.02  | 0.88  | 0.35       | 1.29 | 0.96  | 107.86                     | 0.00 | 1.29 | 0.96  |
| River water              | ASBC-I-550          | 79.65                      | 0.03  | 0.93  | 1.27       | 1.01 | 0.97  | 94.71                      | 0.00 | 1.49 | 0.97  |
|                          | ASBC-I-750          | 66.31                      | 0.02  | 0.82  | 0.28       | 1.36 | 0.91  | 85.35                      | 0.00 | 1.36 | 0.91  |
| Groundwater              | ASBC-I-550          | 76.40                      | 0.04  | 0.93  | 2.15       | 0.88 | 0.95  | 157.70                     | 0.01 | 1.05 | 0.95  |
|                          | ASBC-I-750          | 64.74                      | 0.03  | 0.85  | 0.41       | 1.29 | 0.95  | 107.86                     | 0.00 | 1.29 | 0.95  |

| Isotherm models       | $\text{CrO}_4^{2-}$ | Langmuir |       |         |            |         | Freundlich |       |        |            |         | Sips   |       |        |            |         |
|-----------------------|---------------------|----------|-------|---------|------------|---------|------------|-------|--------|------------|---------|--------|-------|--------|------------|---------|
| Adsorbate             |                     | SSE      | RMSE  | ARE     | Chi-square | HYBRID  | SSE        | RMSE  | ARE    | Chi-square | HYBRID  | SSE    | RMSE  | ARE    | Chi-square | HYBRID  |
| 0.01M $\text{NaNO}_3$ | ASBC-I-550          | 25.135   | 5.459 | 5.414   | 7.519      | 191.550 | 18.426     | 4.962 | -1.477 | 4.399      | 124.195 | 20.071 | 5.094 | -1.513 | 4.548      | 183.779 |
|                       | ASBC-I-750          | 24.921   | 5.286 | -14.468 | 6.987      | 221.404 | 13.087     | 2.837 | 8.588  | 6.378      | 102.956 | 13.086 | 2.837 | 8.584  | 6.375      | 137.261 |
| River water           | ASBC-I-550          | 24.750   | 4.723 | -17.519 | 5.990      | 205.044 | 13.402     | 2.915 | -2.649 | 2.043      | 50.867  | 12.960 | 2.596 | 3.463  | 2.923      | 75.340  |
|                       | ASBC-I-750          | 34.636   | 6.702 | -28.504 | 12.235     | 442.852 | 18.637     | 4.395 | 0.989  | 6.523      | 158.022 | 18.637 | 4.395 | 0.989  | 6.523      | 210.696 |
| Groundwater           | ASBC-I-550          | 22.963   | 4.744 | -8.432  | 4.610      | 137.064 | 14.581     | 3.554 | 0.261  | 2.713      | 69.856  | 14.267 | 3.601 | 1.200  | 3.074      | 108.173 |
|                       | ASBC-I-750          | 35.866   | 6.727 | -37.904 | 12.775     | 524.925 | 15.306     | 3.598 | -1.458 | 3.253      | 81.862  | 15.307 | 3.598 | -1.459 | 3.253      | 109.152 |

**Table S6** parameters obtained for fitted isotherm models for AsO<sub>2</sub><sup>-</sup> removal in multi-metallic system and calculated errors

| Sorption isotherm models | AsO <sub>2</sub> <sup>-</sup> | Langmuir                   |                |                | Freundlich     |      |                | Sips                       |      |      |                |
|--------------------------|-------------------------------|----------------------------|----------------|----------------|----------------|------|----------------|----------------------------|------|------|----------------|
| Waters                   |                               | q <sub>max</sub><br>(mg/g) | K <sub>L</sub> | R <sup>2</sup> | K <sub>f</sub> | n    | R <sup>2</sup> | q <sub>max</sub><br>(mg/g) | K    | n    | R <sup>2</sup> |
| 0.01 M NaNO <sub>3</sub> | ASBC-I-550                    | 100.70                     | 3.85           | 0.85           | 81.03          | 0.42 | 0.85           | 300.28                     | 0.37 | 0.50 | 0.85           |
|                          | ASBC-I-750                    | 94.52                      | 0.12           | 0.90           | 10.36          | 0.69 | 0.94           | 97.74                      | 0.12 | 0.71 | 0.94           |
| River water              | ASBC-I-550                    | 106.41                     | 0.90           | 0.95           | 45.18          | 0.54 | 0.94           | 299.93                     | 0.18 | 0.65 | 0.94           |
|                          | ASBC-I-750                    | 96.42                      | 0.13           | 0.87           | 4.52           | 1.17 | 0.94           | 97.79                      | 0.05 | 1.17 | 0.94           |
| Groundwater              | ASBC-I-550                    | 84.44                      | 2.82           | 0.95           | 58.40          | 0.45 | 0.96           | 300.25                     | 0.25 | 0.52 | 0.96           |
|                          | ASBC-I-750                    | 82.14                      | 0.14           | 0.78           | 0.90           | 1.8  | 0.97           | 97.77                      | 0.01 | 1.88 | 0.97           |

| Isotherm models         | AsO <sub>2</sub> <sup>-</sup> | Langmuir |        |         |            |         | Freundlich |        |         |            |         | Sips   |        |         |            |         |
|-------------------------|-------------------------------|----------|--------|---------|------------|---------|------------|--------|---------|------------|---------|--------|--------|---------|------------|---------|
| Adsorbate               |                               | SSE      | RMSE   | ARE     | Chi-square | HYBRID  | SSE        | RMSE   | ARE     | Chi-square | HYBRID  | SSE    | RMSE   | ARE     | Chi-square | HYBRID  |
| 0.01M NaNO <sub>3</sub> | ASBC-I-550                    | 44.179   | 10.691 | -0.399  | 26.144     | 631.816 | 40.800     | 10.828 | -13.087 | 18.353     | 561.707 | 39.220 | 10.728 | -10.961 | 17.648     | 740.783 |
|                         | ASBC-I-750                    | 33.827   | 7.278  | 8.328   | 17.407     | 286.205 | 27.814     | 5.907  | 7.177   | 9.681      | 198.997 | 27.872 | 5.915  | 7.239   | 9.789      | 266.706 |
| River water             | ASBC-I-550                    | 27.636   | 6.116  | -10.494 | 8.961      | 227.397 | 31.462     | 6.795  | -14.134 | 11.382     | 333.933 | 28.976 | 6.567  | -12.860 | 10.755     | 397.504 |
|                         | ASBC-I-750                    | 41.782   | 8.903  | -2.222  | 12.085     | 319.269 | 30.462     | 6.163  | 14.029  | 33.851     | 285.089 | 30.464 | 6.163  | 14.032  | 33.874     | 380.193 |
| Groundwater             | ASBC-I-550                    | 31.112   | 6.362  | 5.415   | 5.447      | 124.183 | 25.529     | 5.801  | -4.093  | 3.639      | 98.919  | 24.300 | 5.750  | -3.139  | 3.415      | 120.178 |
|                         | ASBC-I-750                    | 60.321   | 12.230 | -26.144 | 23.453     | 774.089 | 18.212     | 4.064  | 12.184  | 23.590     | 165.991 | 18.210 | 4.064  | 12.182  | 23.585     | 221.314 |

**Table S7** parameters obtained for fitted isotherm models for Ni<sup>2+</sup> removal in multi-metallic system and calculated errors

| Sorption isotherm models | Ni <sup>2+</sup> | Langmuir                   |                |                | Freundlich     |      |                | Sips                       |      |      |                |
|--------------------------|------------------|----------------------------|----------------|----------------|----------------|------|----------------|----------------------------|------|------|----------------|
| Waters                   |                  | q <sub>max</sub><br>(mg/g) | K <sub>L</sub> | R <sup>2</sup> | K <sub>f</sub> | n    | R <sup>2</sup> | q <sub>max</sub><br>(mg/g) | K    | n    | R <sup>2</sup> |
| 0.01 M NaNO <sub>3</sub> | ASBC-I-550       | 31.34                      | 0.09           | 0.73           | 6.31           | 0.37 | 0.78           | 44.54                      | 0.16 | 0.54 | 0.76           |
|                          | ASBC-I-750       | 21.12                      | 0.04           | 0.90           | 2.20           | 0.47 | 0.93           | 16.69                      | 0.15 | 0.50 | 0.93           |
| River water              | ASBC-I-550       | 75.42                      | 0.06           | 0.94           | 2.66           | 0.93 | 0.99           | 168.05                     | 0.02 | 1.03 | 0.98           |
|                          | ASBC-I-750       | 27.40                      | 0.06           | 0.77           | 2.43           | 0.56 | 0.83           | 17.17                      | 0.16 | 0.59 | 0.83           |
| Groundwater              | ASBC-I-550       | 98.36                      | 0.29           | 0.98           | 22.99          | 0.53 | 0.95           | 72.69                      | 0.40 | 1.65 | 0.99           |
|                          | ASBC-I-750       | 40.35                      | 0.12           | 0.75           | 1.19           | 1.03 | 0.95           | 52.10                      | 0.02 | 1.03 | 0.95           |

| Isotherm models         | Ni <sup>2+</sup> | Langmuir |       |         |            |          | Freundlich |       |         |            |         | Sips   |       |        |            |         |
|-------------------------|------------------|----------|-------|---------|------------|----------|------------|-------|---------|------------|---------|--------|-------|--------|------------|---------|
| Adsorbate               |                  | SSE      | RMSE  | ARE     | Chi-square | HYBRID   | SSE        | RMSE  | ARE     | Chi-square | HYBRID  | SSE    | RMSE  | ARE    | Chi-square | HYBRID  |
| 0.01M NaNO <sub>3</sub> | ASBC-I-550       | 25.476   | 6.165 | 3.270   | 21.689     | 487.136  | 21.120     | 5.388 | -5.273  | 7.397      | 323.518 | 23.969 | 5.646 | -5.578 | 8.240      | 534.104 |
|                         | ASBC-I-750       | 7.999    | 1.960 | 4.700   | 3.526      | 84.956   | 6.232      | 1.527 | 0.316   | 1.296      | 43.848  | 6.245  | 1.533 | 0.509  | 1.325      | 66.647  |
| River water             | ASBC-I-550       | 21.563   | 5.560 | -10.059 | 4.387      | 150.674  | 9.600      | 1.946 | 5.477   | 1.191      | 34.502  | 12.214 | 2.806 | 2.097  | 1.359      | 68.214  |
|                         | ASBC-I-750       | 18.636   | 4.533 | -2.634  | 7.486      | 322.869  | 15.946     | 3.916 | -2.755  | 5.476      | 253.247 | 16.003 | 3.925 | -2.680 | 5.528      | 382.096 |
| Groundwater             | ASBC-I-550       | 15.746   | 4.265 | -13.479 | 4.321      | 208.756  | 28.983     | 6.348 | -18.069 | 8.029      | 408.837 | 13.997 | 3.131 | -5.598 | 1.615      | 94.245  |
|                         | ASBC-I-750       | 47.433   | 9.630 | -57.550 | 20.062     | 1254.274 | 16.047     | 4.046 | -7.242  | 3.046      | 95.909  | 16.047 | 4.046 | -7.242 | 3.046      | 143.865 |

**Table S8** parameters obtained for fitted isotherm models for Cd<sup>2+</sup> removal in multi-metallic system and calculated errors

| Sorption isotherm models | Cd <sup>2+</sup> | Langmuir                   |                |                | Freundlich     |      |                | Sips                       |      |      |                |
|--------------------------|------------------|----------------------------|----------------|----------------|----------------|------|----------------|----------------------------|------|------|----------------|
| Waters                   |                  | q <sub>max</sub><br>(mg/g) | K <sub>L</sub> | R <sup>2</sup> | K <sub>f</sub> | n    | R <sup>2</sup> | q <sub>max</sub><br>(mg/g) | K    | n    | R <sup>2</sup> |
| 0.01 M NaNO <sub>3</sub> | ASBC-I-550       | 171.18                     | 0.03           | 0.94           | 9.83           | 0.65 | 0.94           | 224.20                     | 0.04 | 0.78 | 0.94           |
|                          | ASBC-I-750       | 152.30                     | 0.03           | 0.90           | 1.75           | 1.16 | 0.94           | 213.56                     | 0.01 | 1.16 | 0.94           |
| River water              | ASBC-I-550       | 163.40                     | 0.16           | 0.90           | 15.37          | 1.07 | 0.93           | 240.08                     | 0.08 | 1.10 | 0.91           |
|                          | ASBC-I-750       | 157.45                     | 0.08           | 0.89           | 3.41           | 1.52 | 0.95           | 191.62                     | 0.02 | 1.52 | 0.95           |
| Groundwater              | ASBC-I-550       | 111.21                     | 0.29           | 0.88           | 15.37          | 1.07 | 0.93           | 240.08                     | 0.08 | 1.10 | 0.91           |
|                          | ASBC-I-750       | 115.59                     | 0.30           | 0.93           | 26.92          | 0.57 | 0.89           | 213.31                     | 0.14 | 0.59 | 0.89           |

| Isotherm models         | Cd <sup>2+</sup> | Langmuir |        |         |            |         | Freundlich |       |         |            |         | Sips   |       |         |            |         |
|-------------------------|------------------|----------|--------|---------|------------|---------|------------|-------|---------|------------|---------|--------|-------|---------|------------|---------|
| Adsorbate               |                  | SSE      | RMSE   | ARE     | Chi-square | HYBRID  | SSE        | RMSE  | ARE     | Chi-square | HYBRID  | SSE    | RMSE  | ARE     | Chi-square | HYBRID  |
| 0.01M NaNO <sub>3</sub> | ASBC-I-550       | 30.120   | 6.712  | 19.890  | 60.174     | 420.921 | 24.956     | 5.917 | 10.025  | 13.207     | 260.430 | 27.391 | 6.316 | 12.082  | 20.248     | 468.718 |
|                         | ASBC-I-750       | 28.946   | 7.360  | 7.170   | 17.770     | 372.402 | 27.859     | 6.225 | 18.721  | 50.360     | 403.396 | 27.857 | 6.225 | 18.718  | 50.351     | 605.085 |
| River water             | ASBC-I-550       | 34.410   | 9.232  | -7.419  | 8.233      | 324.635 | 32.263     | 7.963 | 7.612   | 11.020     | 321.389 | 32.086 | 8.623 | 1.713   | 8.682      | 470.575 |
|                         | ASBC-I-750       | 36.128   | 9.560  | -10.697 | 9.410      | 355.752 | 30.220     | 6.808 | 18.130  | 27.354     | 373.980 | 30.220 | 6.808 | 18.131  | 27.356     | 560.981 |
| Groundwater             | ASBC-I-550       | 38.447   | 10.176 | -14.300 | 10.508     | 410.714 | 32.263     | 7.963 | 7.612   | 11.020     | 321.389 | 32.086 | 8.623 | 1.713   | 8.682      | 470.575 |
|                         | ASBC-I-750       | 33.233   | 7.907  | -20.807 | 9.872      | 436.275 | 38.614     | 9.732 | -24.348 | 14.869     | 668.392 | 38.559 | 9.710 | -24.306 | 14.803     | 997.934 |

## Section-4

### Column transport models

| Column transport models | Non-linear equations                                                                  |
|-------------------------|---------------------------------------------------------------------------------------|
| <b>Thomas</b>           | $\frac{C}{C_0} = \frac{1}{1 + \exp\left(\frac{k_{TH}q_0m}{v} - k_{TH}C_0t\right)}$    |
| <b>Yoon- Nelson</b>     | $\frac{C}{C_0} = \frac{\exp(k_{YN}t - \tau k_{YN})}{1 + \exp(k_{YN}t - \tau k_{YN})}$ |

Where

$k_{TH}$ = Thomas rate constant (mL/min·mg),

$q_0$ = adsorption capacity of the C-BC-nZVI nanotrident,

$v$ = flow rate (mL/min),

$m$ = adsorbent weight (g), and

$t$ = breakthrough time (min).

$k_{YN}$ = Yoon-nelson rate constant (mL/min·mg),

$\tau$ = time required for 50% of breakthrough (min), and

Thomas model assumes Langmuir model of adsorption-desorption kinetics in which 2<sup>nd</sup> order reversible kinetics is followed by the rate driving force and does not take axial dispersion into account<sup>12</sup>. Whereas, Yoon- Nelson model is simpler with the assumption that “the rate of decrease in the probability of each adsorbate molecule to be adsorbed is proportional to its adsorption probability and also to the probability of adsorbate breakthrough on the adsorbent

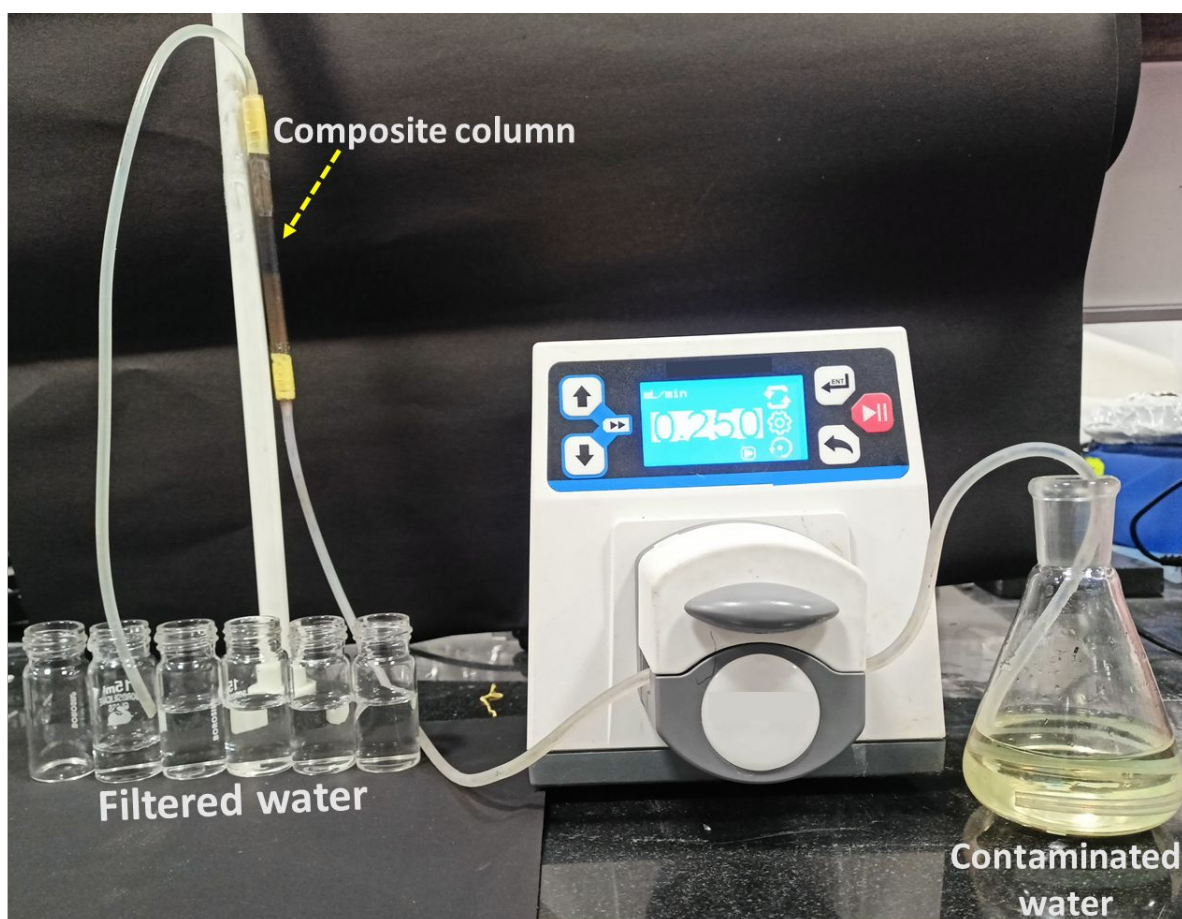

**Fig. S10** Column filtration setup showing continuous removal of contaminants and generation of clean water



**Table S9** parameters obtained for fitted column transport models for multi-metallic species removal in 0.01M NaNO<sub>3</sub> solutions and calculated errors

|                                |            | 0.01M NaNO <sub>3</sub>            |                          |                |       |       |           |            |         |
|--------------------------------|------------|------------------------------------|--------------------------|----------------|-------|-------|-----------|------------|---------|
|                                |            | Thomas model                       |                          |                |       |       |           |            |         |
| Adsorbate                      |            | K <sub>TH</sub><br>(L/mg.min)      | q <sub>0</sub><br>(mg/g) | R <sup>2</sup> | SSE   | RMSE  | ARE       | Chi-square | HYBRID  |
| CrO <sub>4</sub> <sup>2-</sup> | ASBC-I-550 | 1.10E-03                           | 27.98                    | 0.98           | 0.459 | 0.034 | -5254.043 | 0.221      | 192.689 |
|                                | ASBC-I-750 | 9.12E-04                           | 26.30                    | 0.95           | 0.638 | 0.041 | -6245.810 | 0.279      | 243.615 |
| AsO <sub>2</sub> <sup>-</sup>  | ASBC-I-550 | 1.10E-03                           | 27.66                    | 0.99           | 0.312 | 0.024 | -1354.465 | 0.159      | 21.011  |
|                                | ASBC-I-750 | 9.02E-04                           | 25.70                    | 0.96           | 0.790 | 0.052 | -4008.482 | 0.311      | 110.833 |
| Ni <sup>2+</sup>               | ASBC-I-550 | 1.37E-03                           | 21.55                    | 1.00           | 0.319 | 0.023 | -1120.450 | 0.124      | 11.899  |
|                                | ASBC-I-750 | 1.08E-03                           | 20.41                    | 0.97           | 0.972 | 0.064 | -5063.160 | 0.362      | 183.129 |
| Cd <sup>2+</sup>               | ASBC-I-550 | 1.29E-03                           | 25.78                    | 0.99           | 0.384 | 0.030 | -1774.440 | 0.134      | 29.354  |
|                                | ASBC-I-750 | 9.74E-04                           | 23.99                    | 0.96           | 0.947 | 0.065 | -3129.864 | 0.365      | 83.167  |
|                                |            | Yoon-Nelson model                  |                          |                |       |       |           |            |         |
| Adsorbate                      |            | K <sub>YN</sub> (h <sup>-1</sup> ) | τ (h)                    | R <sup>2</sup> | SSE   | RMSE  | ARE       | Chi-square | HYBRID  |
| CrO <sub>4</sub> <sup>2-</sup> | ASBC-I-550 | 0.66                               | 9.33                     | 0.98           | 0.459 | 0.034 | -5254.043 | 0.221      | 192.689 |
|                                | ASBC-I-750 | 0.55                               | 8.77                     | 0.95           | 0.638 | 0.041 | -6245.810 | 0.279      | 243.615 |
| AsO <sub>2</sub> <sup>-</sup>  | ASBC-I-550 | 0.66                               | 9.22                     | 0.99           | 0.312 | 0.024 | -1354.465 | 0.159      | 21.011  |
|                                | ASBC-I-750 | 0.54                               | 8.57                     | 0.96           | 0.790 | 0.052 | -4008.482 | 0.311      | 110.833 |
| Ni <sup>2+</sup>               | ASBC-I-550 | 0.82                               | 7.18                     | 1.00           | 0.319 | 0.023 | -1120.450 | 0.124      | 11.899  |
|                                | ASBC-I-750 | 0.65                               | 6.80                     | 0.97           | 0.972 | 0.064 | -5063.160 | 0.362      | 183.129 |
| Cd <sup>2+</sup>               | ASBC-I-550 | 0.78                               | 8.59                     | 0.99           | 0.384 | 0.030 | -1774.440 | 0.134      | 29.354  |
|                                | ASBC-I-750 | 0.58                               | 8.00                     | 0.96           | 0.947 | 0.065 | -3129.864 | 0.365      | 83.167  |

**Table S10** parameters obtained for fitted column transport models for multi-metallic species removal in river water solutions and calculated errors

| River water       |            | Thomas model                |                 |       |       |       |            |            |         |
|-------------------|------------|-----------------------------|-----------------|-------|-------|-------|------------|------------|---------|
| Adsorbate         |            | $K_{TH}$<br>(L/mg.min)      | $q_0$<br>(mg/g) | $R^2$ | SSE   | RMSE  | ARE        | Chi-square | HYBRID  |
| $CrO_4^{2-}$      | ASBC-I-550 | 5.96E-04                    | 31.99           | 0.92  | 0.851 | 0.050 | -10924.642 | 0.529      | 598.081 |
|                   | ASBC-I-750 | 6.95E-04                    | 50.56           | 0.79  | 0.110 | 0.007 | -1244.638  | 0.071      | 7.432   |
| $AsO_2^-$         | ASBC-I-550 | 6.05E-04                    | 30.39           | 0.93  | 0.872 | 0.052 | -7746.572  | 0.531      | 321.470 |
|                   | ASBC-I-750 | 6.69E-04                    | 42.33           | 0.84  | 0.251 | 0.016 | -1158.979  | 0.153      | 10.646  |
| $Ni^{2+}$         | ASBC-I-550 | 6.24E-04                    | 32.46           | 0.94  | 0.664 | 0.041 | -4193.944  | 0.380      | 119.078 |
|                   | ASBC-I-750 | 7.03E-04                    | 43.93           | 0.82  | 0.204 | 0.013 | -652.773   | 0.132      | 3.950   |
| $Cd^{2+}$         | ASBC-I-550 | 7.17E-04                    | 38.31           | 0.97  | 0.309 | 0.020 | -1339.184  | 0.134      | 15.109  |
|                   | ASBC-I-750 | 8.21E-04                    | 50.82           | 0.87  | 0.033 | 0.002 | -137.137   | 0.018      | 0.266   |
| Yoon-Nelson model |            |                             |                 |       |       |       |            |            |         |
| Adsorbate         |            | $K_{YN}$ (h <sup>-1</sup> ) | $T$ (h)         | $R^2$ | SSE   | RMSE  | ARE        | Chi-square | HYBRID  |
| $CrO_4^{2-}$      | ASBC-I-550 | 0.36                        | 10.66           | 0.92  | 0.851 | 0.050 | -10924.642 | 0.529      | 598.081 |
|                   | ASBC-I-750 | 0.42                        | 16.84           | 0.79  | 0.110 | 0.007 | -1244.638  | 0.071      | 7.432   |
| $AsO_2^-$         | ASBC-I-550 | 0.36                        | 10.13           | 0.93  | 0.872 | 0.052 | -7746.572  | 0.531      | 321.470 |
|                   | ASBC-I-750 | 0.40                        | 14.10           | 0.84  | 0.251 | 0.016 | -1158.979  | 0.153      | 10.646  |
| $Ni^{2+}$         | ASBC-I-550 | 0.37                        | 10.82           | 0.94  | 0.664 | 0.041 | -4193.944  | 0.380      | 119.078 |
|                   | ASBC-I-750 | 0.42                        | 14.63           | 0.82  | 0.204 | 0.013 | -652.773   | 0.132      | 3.950   |
| $Cd^{2+}$         | ASBC-I-550 | 0.43                        | 12.77           | 0.97  | 0.309 | 0.020 | -1339.184  | 0.134      | 15.109  |
|                   | ASBC-I-750 | 0.44                        | 17.85           | 0.88  | 0.033 | 0.002 | -137.137   | 0.018      | 0.266   |

**Table S11** parameters obtained for fitted column transport models for multi-metallic species removal in groundwater water solutions and calculated errors

| Groundwater       |            | Thomas model                |                 |       |       |       |           |            |         |
|-------------------|------------|-----------------------------|-----------------|-------|-------|-------|-----------|------------|---------|
| Adsorbate         |            | $K_{TH}$<br>(L/mg.min)      | $q_0$<br>(mg/g) | $R^2$ | SSE   | RMSE  | ARE       | Chi-square | HYBRID  |
| $CrO_4^{2-}$      | ASBC-I-550 | 9.07E-04                    | 31.38           | 0.95  | 0.509 | 0.039 | -1878.581 | 0.182      | 25.005  |
|                   | ASBC-I-750 | 8.14E-04                    | 42.70           | 0.87  | 0.060 | 0.004 | -9333.129 | 0.043      | 43.270  |
| $AsO_2^-$         | ASBC-I-550 | 6.75E-04                    | 27.48           | 0.93  | 0.753 | 0.045 | -5437.260 | 0.285      | 197.924 |
|                   | ASBC-I-750 | 8.18E-04                    | 32.41           | 0.89  | 0.392 | 0.023 | -1305.203 | 0.155      | 12.136  |
| $Ni^{2+}$         | ASBC-I-550 | 5.66E-04                    | 38.00           | 0.91  | 0.564 | 0.042 | -2892.621 | 0.225      | 55.979  |
|                   | ASBC-I-750 | 7.41E-04                    | 37.65           | 0.91  | 0.206 | 0.012 | -883.653  | 0.073      | 5.178   |
| $Cd^{2+}$         | ASBC-I-550 | 9.30E-04                    | 54.56           | 0.95  | 0.004 | 0.000 | -11.707   | 0.002      | 0.008   |
|                   | ASBC-I-750 | 6.02E-04                    | 71.01           | 0.97  | 0.002 | 0.000 | -26.168   | 0.001      | 0.006   |
| Yoon-Nelson model |            |                             |                 |       |       |       |           |            |         |
| Adsorbate         |            | $K_{YN}$ (h <sup>-1</sup> ) | $T$ (h)         | $R^2$ | SSE   | RMSE  | ARE       | Chi-square | HYBRID  |
| $CrO_4^{2-}$      | ASBC-I-550 | 0.54                        | 10.46           | 0.95  | 0.509 | 0.039 | -1878.581 | 0.182      | 25.005  |
|                   | ASBC-I-750 | 0.49                        | 14.22           | 0.87  | 0.060 | 0.004 | -9333.129 | 0.043      | 43.270  |
| $AsO_2^-$         | ASBC-I-550 | 0.41                        | 9.15            | 0.93  | 0.753 | 0.045 | -5437.260 | 0.285      | 197.924 |
|                   | ASBC-I-750 | 0.49                        | 10.79           | 0.89  | 0.392 | 0.023 | -1305.203 | 0.155      | 12.136  |
| $Ni^{2+}$         | ASBC-I-550 | 0.34                        | 12.61           | 0.91  | 0.564 | 0.042 | -2892.621 | 0.225      | 55.979  |
|                   | ASBC-I-750 | 0.45                        | 12.53           | 0.91  | 0.206 | 0.012 | -883.653  | 0.073      | 5.178   |
| $Cd^{2+}$         | ASBC-I-550 | 0.43                        | 21.10           | 0.93  | 0.004 | 0.000 | -11.707   | 0.002      | 0.008   |
|                   | ASBC-I-750 | 0.36                        | 23.90           | 0.97  | 0.002 | 0.000 | -26.168   | 0.001      | 0.006   |

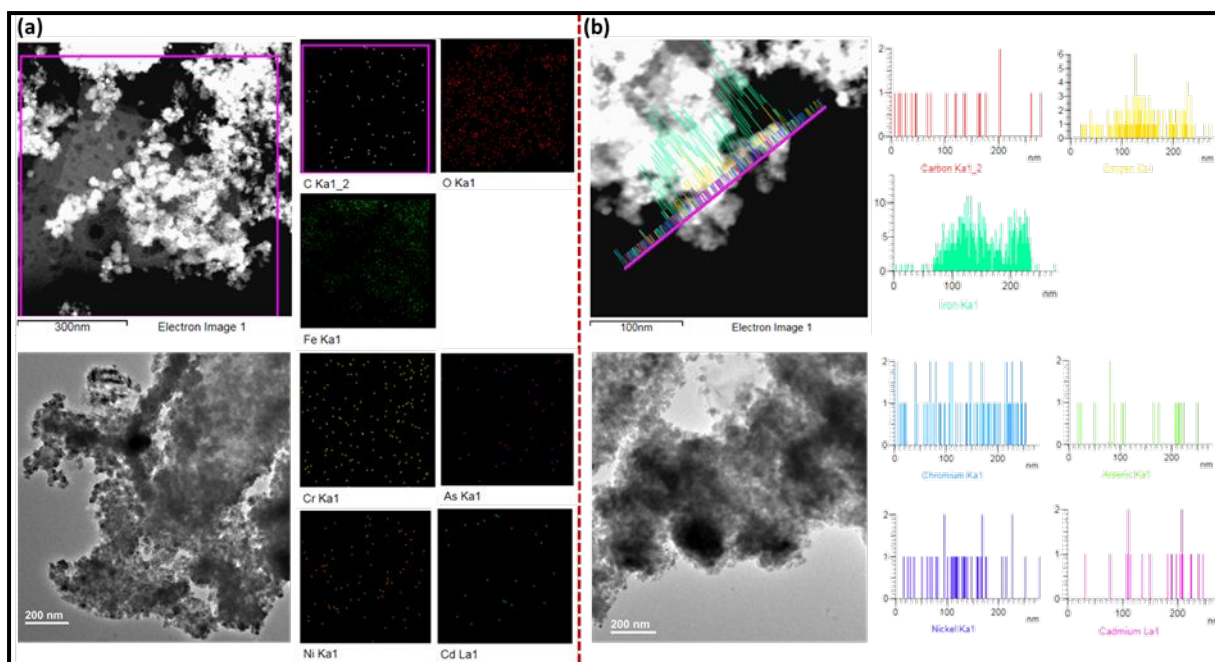

**Fig. S11** (a) elemental mapping and (b) line can of ASBC-I-550 composite after the sorption of contaminants

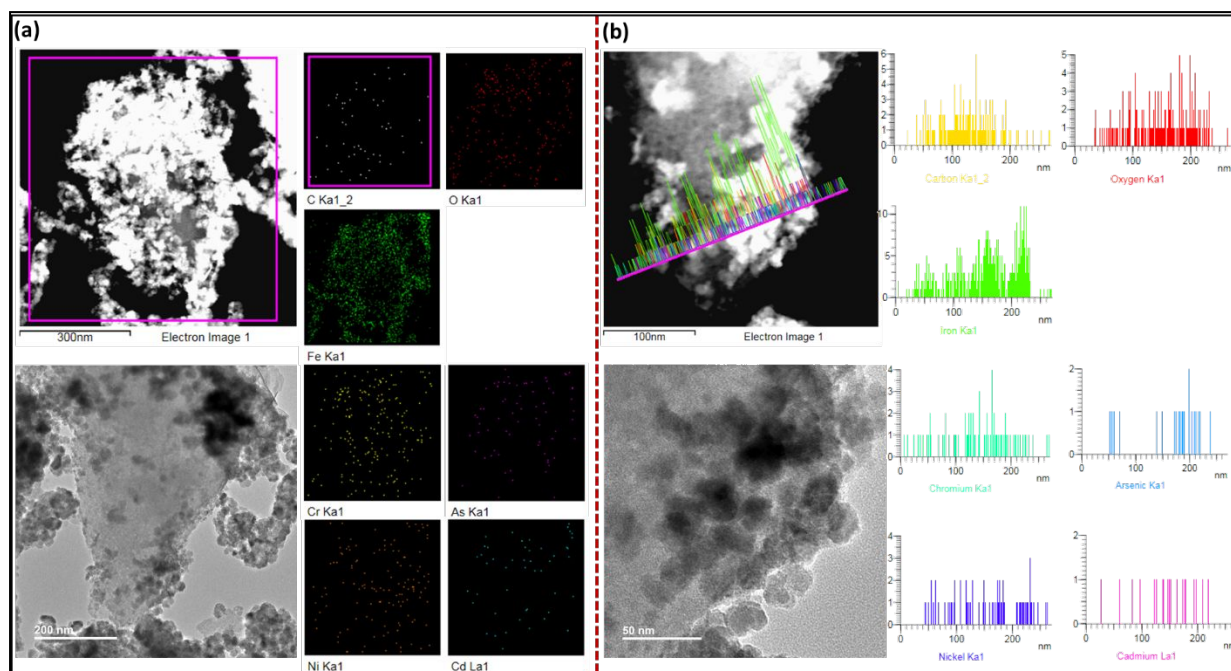

**Fig. S12** (a) elemental mapping and (b) line can of ASBC-I-750 composite after the sorption of contaminants

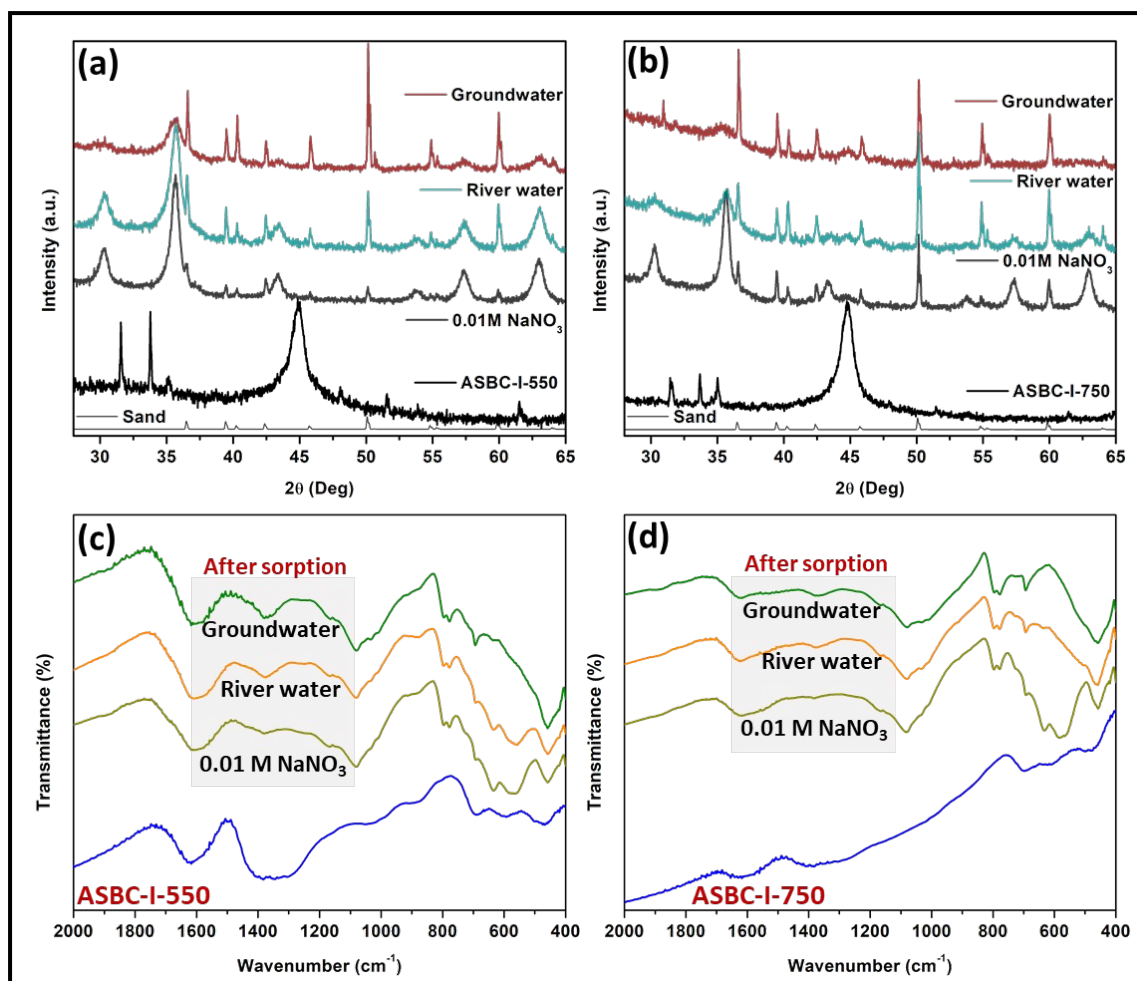

**Fig. S13** (a, b) pXRD and (c, d) FTIR spectra before and after the sorption of multi-metallic species on both the composites in various aqueous matrices

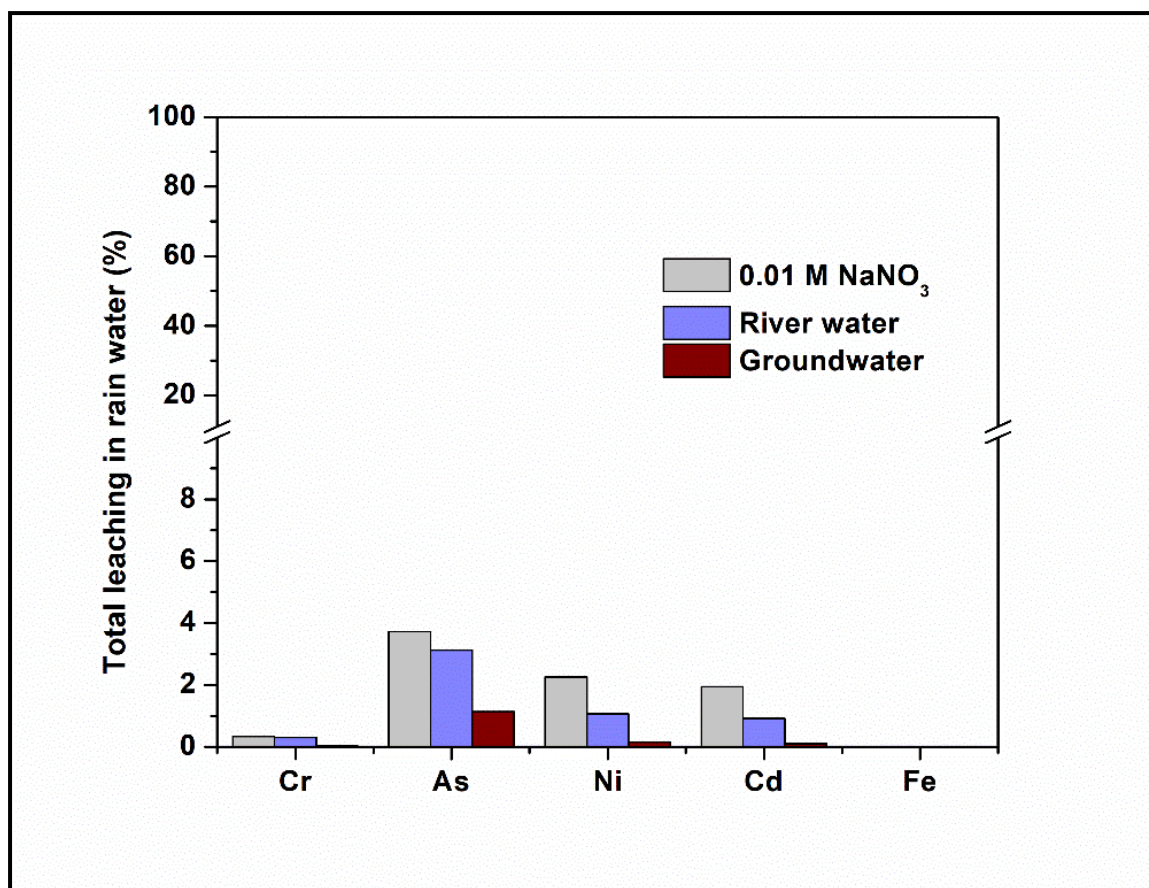

**Fig. S14** Leaching of contaminants and iron in synthetic rain water solution from the spent composite

**Table S12** Summary of reported adsorbents and their contaminants sorption capacities

| Adsorbents                                               | Contaminants     |                                |                               |                  | Reference         |
|----------------------------------------------------------|------------------|--------------------------------|-------------------------------|------------------|-------------------|
|                                                          | Ni <sup>2+</sup> | CrO <sub>4</sub> <sup>2-</sup> | AsO <sub>2</sub> <sup>-</sup> | Cd <sup>2+</sup> |                   |
| <b>ASBC-I-550</b>                                        | 44.5             | 125.9                          | 300.3                         | 171.2            | <b>This study</b> |
| <b>ASBC-I-750</b>                                        | 16.7             | 107.8                          | 97.7                          | 152.3            | <b>This study</b> |
| <b>Biochar-nZVI</b>                                      | 47.85            | 23.09                          | -                             | 39.53            | 14                |
| <b>Bentonite supported nZVI</b>                          | 50.25            | 9                              |                               |                  | 15, 16            |
| <b>Bentonite-nZVI</b>                                    | 16.5             |                                |                               | 14.25            | 16                |
| <b>Activated alumina</b>                                 |                  | 25.57                          |                               |                  | 17                |
| <b>Nano- alumina</b>                                     | 30.82            | -                              |                               |                  | 18                |
| <b>(nZVI)-Fe<sub>3</sub>O<sub>4</sub> nanocomposites</b> |                  | 20.41                          |                               |                  | 19                |
| <b>Modified activated carbon</b>                         | 78.12            | -                              |                               |                  | 20                |
| <b>Au-nZVI</b>                                           |                  |                                |                               | 40- 188          | 21                |
| <b>Activated carbon (AC)</b>                             |                  | 9.89                           |                               |                  | 22                |
| <b>AC-nZVI</b>                                           |                  | 25                             | 18.2                          |                  | 22, 23            |
| <b>coal fly ash-nZVI</b>                                 |                  |                                |                               | 200              | 24                |
| <b>Magnetic magnetite (Fe<sub>3</sub>O<sub>4</sub>)</b>  |                  | 20.16                          |                               |                  | 25                |
| <b>Biochar-magnetite</b>                                 |                  |                                | 5.49                          |                  | 26                |

|                                                                           |        |    |
|---------------------------------------------------------------------------|--------|----|
| <b>Ascorbic acid coated<br/>Fe<sub>3</sub>O<sub>4</sub> nanoparticles</b> | 46.06  | 27 |
| <b>Nanoscale Fe-Mn<br/>Binary Oxides Loaded<br/>on Zeolite</b>            | 296.23 | 28 |

**Table S13 Obtained species % from spectral fits in different elemental regions before and after sorption**

| <b>Fe2p region</b> |                        | <b>Fe(II)</b>             | <b>Fe(III)</b>         |                                   |
|--------------------|------------------------|---------------------------|------------------------|-----------------------------------|
|                    | <b>Before sorption</b> | 62.3                      | 37.7                   |                                   |
|                    | <b>After sorption</b>  | 58.4                      | 41.6                   |                                   |
|                    |                        | <b>-OH<sub>2</sub></b>    | <b>-OH<sup>-</sup></b> | <b>-O<sub>2</sub><sup>-</sup></b> |
| <b>O1s region</b>  | <b>Before sorption</b> | 3.37                      | 87.57                  | 9.05                              |
|                    | <b>After sorption</b>  | 24.7                      | 34.4                   | 40.9                              |
| <b>C1s region</b>  |                        | <b>-O-C=O</b>             | <b>-C=O</b>            | <b>C-C/ C=C</b>                   |
|                    | <b>Before sorption</b> | 19.2                      | 17.8                   | 60.5                              |
|                    | <b>After sorption</b>  | 14.8                      | 18.1                   | 62.7                              |
| <b>Cr2p</b>        |                        | <b>Cr(III)</b>            | <b>Cr(VI)</b>          |                                   |
|                    | <b>After sorption</b>  | 74.8                      | 25.2                   |                                   |
| <b>As3d</b>        |                        | <b>As(III)</b>            | <b>As(V)</b>           |                                   |
|                    | <b>After sorption</b>  | 51.3                      | 48.7                   |                                   |
| <b>Ni2p</b>        |                        | <b>Ni(OH)<sub>2</sub></b> |                        |                                   |
|                    | <b>After sorption</b>  | 100                       |                        |                                   |
| <b>Cd3d</b>        |                        | <b>Cd(OH)<sub>2</sub></b> |                        |                                   |
|                    | <b>After sorption</b>  | 100                       |                        |                                   |



## References

1. N. Khandelwal, M. P. Behera, J. K. Rajak and G. K. Darbha, Biochar–nZVI nanocomposite: optimization of grain size and Fe 0 loading, application and removal mechanism of anionic metal species from soft water, hard water and groundwater, *Clean Technol Envir*, 2020, **22**, 1015-1024.
2. N. Khandelwal and G. K. Darbha, Combined antioxidant capping and surface support for the preservation of redox-sensitive nanoparticles: a greener way for continuous elimination of multi-metallic species, *Chem Commun*, 2021, **(In review)**.
3. N. Hemati Matin, M. Jalali, V. Antoniadis, S. M. Shaheen, J. Wang, T. Zhang, H. Wang and J. Rinklebe, Almond and walnut shell-derived biochars affect sorption-desorption, fractionation, and release of phosphorus in two different soils, *Chemosphere*, 2020, **241**, 124888.
4. A. Liu and W.-x. Zhang, Fine structural features of nanoscale zero-valent iron characterized by spherical aberration corrected scanning transmission electron microscopy (Cs-STEM), *Analyst*, 2014, **139**, 4512-4518.
5. Y. S. Ho and G. McKay, Pseudo-second order model for sorption processes, *Process Biochem*, 1999, **34**, 451-465.
6. A. G. N. Wamba, E. C. Lima, S. K. Ndi, P. S. Thue, J. G. Kayem, F. S. Rodembusch, G. S. dos Reis and W. S. de Alencar, Synthesis of grafted natural pozzolan with 3-aminopropyltriethoxysilane: preparation, characterization, and application for removal of Brilliant Green 1 and Reactive Black 5 from aqueous solutions, *Environ Sci Pollut R*, 2017, **24**, 21807-21820.
7. Y. Liu and L. Shen, A general rate law equation for biosorption, *Biochem Eng J*, 2008, **38**, 390-394.
8. J.-P. Simonin and J. Bouté, Intraparticle diffusion-adsorption model to describe liquid/solid adsorption kinetics, *Revista Mexicana De Ingenieria Quimica*, 2016, **15**, 161-173.
9. H. K. Boparai, M. Joseph and D. M. O'Carroll, Kinetics and thermodynamics of cadmium ion removal by adsorption onto nano zerovalent iron particles, *J Hazard Mater*, 2011, **186**, 458-465.
10. N. Ayawei, A. N. Ebelegi and D. Wankasi, Modelling and Interpretation of Adsorption Isotherms, *J Chem-Ny*, 2017, DOI: Artn 3039817  
10.1155/2017/3039817.
11. A. Nimibofa, A. Ebelegi and W. Donbebe, Modelling and Interpretation of Adsorption Isotherms, *Hindawi Journal of Chemistry*, 2017, **Volume 2017**, 11 pages.
12. Z. Z. Chowdhury, S. M. Zain, A. K. Rashid, R. F. Rafique and K. Khalid, Breakthrough Curve Analysis for Column Dynamics Sorption of Mn(II) Ions from Wastewater by Using *Mangostana garcinia* Peel-Based Granular-Activated Carbon, *J Chem-Ny*, 2013, **2013**, 959761.
13. S. Chang, H. Fu, X. Wu, C. Liu, Z. Li, Y. Dai and H. Zhang, Batch and fixed-bed column studies for selective removal of cesium ions by compressible Prussian blue/polyurethane sponge, *RSC Advances*, 2018, **8**, 36459-36467.
14. S. S. Zhu, S. H. Ho, X. C. Huang, D. W. Wang, F. Yang, L. Wang, C. Y. Wang, X. D. Cao and F. Ma, Magnetic Nanoscale Zerovalent Iron Assisted Biochar: Interfacial Chemical Behaviors and Heavy Metals Remediation Performance, *Acs Sustain Chem Eng*, 2017, **5**, 9673-9682.
15. L. N. Shi, X. Zhang and Z. L. Chen, Removal of Chromium (VI) from wastewater using bentonite-supported nanoscale zero-valent iron, *Water Res*, 2011, **45**, 886-892.
16. N. A. Zarime, W. Z. W. Yaacob and H. Jamil, Removal of heavy metals using bentonite supported nano-zero valent iron particles, *AIP Conference Proceedings*, 2018, **1940**, 020029.

17. A. K. Bhattacharya, T. K. Naiya, S. N. Mandal and S. K. Das, Adsorption, kinetics and equilibrium studies on removal of Cr(VI) from aqueous solutions using different low-cost adsorbents, *Chem Eng J*, 2008, **137**, 529-541.
18. V. Srivastava, C. H. Weng, V. K. Singh and Y. C. Sharma, Adsorption of Nickel Ions from Aqueous Solutions by Nano Alumina: Kinetic, Mass Transfer, and Equilibrium Studies, *Journal of Chemical & Engineering Data*, 2011, **56**, 1414-1422.
19. X. S. Lv, Y. J. Hu, J. Tang, T. T. Sheng, G. M. Jiang and X. H. Xu, Effects of co-existing ions and natural organic matter on removal of chromium (VI) from aqueous solution by nanoscale zero valent iron (nZVI)-Fe<sub>3</sub>O<sub>4</sub> nanocomposites, *Chem Eng J*, 2013, **218**, 55-64.
20. M. O. Abd El-Magied, A. M. A. Hassan, H. M. H. Gad, T. F. Mohammaden and M. A. M. Youssef, Removal of nickel (II) ions from aqueous solutions using modified activated carbon: A kinetic and equilibrium study, *Journal of Dispersion Science and Technology*, 2018, **39**, 862-873.
21. Y. Su, A. S. Adeleye, Y. Huang, X. Sun, C. Dai, X. Zhou, Y. Zhang and A. A. Keller, Simultaneous removal of cadmium and nitrate in aqueous media by nanoscale zerovalent iron (nZVI) and Au doped nZVI particles, *Water Res*, 2014, **63**, 102-111.
22. S. Mortazavian, H. An, D. Chun and J. Moon, Activated carbon impregnated by zero-valent iron nanoparticles (AC/nZVI) optimized for simultaneous adsorption and reduction of aqueous hexavalent chromium: Material characterizations and kinetic studies, *Chem Eng J*, 2018, **353**, 781-795.
23. H. Zhu, Y. Jia, X. Wu and H. Wang, Removal of arsenic from water by supported nano zero-valent iron on activated carbon, *J Hazard Mater*, 2009, **172**, 1591-1596.
24. L. Ma, Q. Wei, Y. Chen, Q. Song, C. Sun, Z. Wang and G. Wu, Removal of cadmium from aqueous solutions using industrial coal fly ash-nZVI, *Roy Soc Open Sci*, 2018, **5**, 171051-171051.
25. S. Rajput, C. U. Pittman, Jr. and D. Mohan, Magnetic magnetite (Fe<sub>3</sub>O<sub>4</sub>) nanoparticle synthesis and applications for lead (Pb<sup>2+</sup>) and chromium (Cr<sup>6+</sup>) removal from water, *J Colloid Interface Sci*, 2016, **468**, 334-346.
26. C. M. Navarathna, A. G. Karunanayake, S. R. Gunatilake, C. U. Pittman, F. Perez, D. Mohan and T. Mlsna, Removal of Arsenic(III) from water using magnetite precipitated onto Douglas fir biochar, *J Environ Manage*, 2019, **250**, 109429.
27. L. Feng, M. Cao, X. Ma, Y. Zhu and C. Hu, Superparamagnetic high-surface-area Fe<sub>3</sub>O<sub>4</sub> nanoparticles as adsorbents for arsenic removal, *J Hazard Mater*, 2012, **217-218**, 439-446.
28. S. Kong, Y. Wang, Q. Hu and A. K. Olusegun, Magnetic nanoscale Fe-Mn binary oxides loaded zeolite for arsenic removal from synthetic groundwater, *Colloids and Surfaces A: Physicochemical and Engineering Aspects*, 2014, **457**, 220-227.
